# Supplementary material
Source: PubMed Central journal article supplement (PMC152854)
Supplement: nar_31_6_1704__1.pdf [file nar_31_6_1704__1.pdf]

Table 1 - Differences in functional classification between TIGR (strain 26695), AstraZeneca (Strain J99) and PyloriGene database

|                                                            |                                                                                                                                                                                                                                                                  | Functional categories                                                                                                                                                                                                                                        |                                                                                                                                                                                                                                                                                                                                                                                              |
|------------------------------------------------------------|------------------------------------------------------------------------------------------------------------------------------------------------------------------------------------------------------------------------------------------------------------------|--------------------------------------------------------------------------------------------------------------------------------------------------------------------------------------------------------------------------------------------------------------|----------------------------------------------------------------------------------------------------------------------------------------------------------------------------------------------------------------------------------------------------------------------------------------------------------------------------------------------------------------------------------------------|
|                                                            | TIGR                                                                                                                                                                                                                                                             | AstraZeneca                                                                                                                                                                                                                                                  | PyloriGene                                                                                                                                                                                                                                                                                                                                                                                   |
| Categories                                                 | Sub-categories                                                                                                                                                                                                                                                   | Sub-categories                                                                                                                                                                                                                                               | Sub-categories                                                                                                                                                                                                                                                                                                                                                                               |
| Amino acid biosynthesis                                    | Aromatic amino acid family<br>Aspartate family<br>Glutamate family<br>Pyruvate family<br>Serine family<br>Other                                                                                                                                                  | Aromatic amino acid family<br>Aspartate family<br>Glutamate family<br>Pyruvate family<br>Serine family<br>General                                                                                                                                            | 1- Amino acid biosynthesis<br>1.1-Aromatic amino acid family<br>1.2-Aspartate family<br>1.3-Glutamate family<br>1.4-Pyruvate family<br>1.5-Serine family<br>1.6-Other                                                                                                                                                                                                                        |
| Purine, pyrimidines, nucleosides, and nucleotides          | 2-deoxyribonucleotide metabolism<br>Purine ribonucleotide biosynthesis<br>Pyrimidine ribonucleotide biosynthesis<br>Salvage of nucleosides and nucleotides<br>Sugar-nucleotide biosynthesis and conversions<br>Other                                             | 2-deoxyribonucleotide metabolism<br>Purine ribonucleotide biosynthesis<br>Pyrimidine ribonucleotide biosynthesis<br>Salvage and interconversion of nucleosides and nucleotides<br>Sugar-nucleotide biosynthesis and conversions<br>all members of this group | 2-Purine, pyrimidines, nucleosides, and nucleotides<br>2.1-2-deoxyribonucleotide metabolism<br>2.2-Purine ribonucleotide biosynthesis<br>2.3-Pyrimidine ribonucleotide biosynthesis<br>2.4-Salvage of nucleosides and nucleotides<br>2.5-Sugar-nucleotide biosynthesis and conversions<br>3.1-General                                                                                        |
| Fatty acid and phospholipid metabolism                     | <b>Biosynthesis</b><br><b>Degradation</b><br>Other                                                                                                                                                                                                               | Fatty acid and phospholipid metabolism<br>all members of this group                                                                                                                                                                                          | 3-Fatty acid and phospholipid metabolism<br>3.1-General                                                                                                                                                                                                                                                                                                                                      |
| Biosynthesis of cofactors, prosthetic groups, and carriers | Biotin<br>Folic acid<br>Heme, porphyrin and cobalamine<br>Menquinone and ubiquinone<br>Molybdopterin<br>Pantothenate and coenzyme A<br>Pyridoxine<br>Riboflavin, FMN and FAD<br>Thioredoxin, glutaredoxin, and glutathione<br>Thiamine<br>Pyrimidine nucleotides | Biotin<br>Folic acid<br>Heme and porphyrin<br>Menquinone and ubiquinone<br>Molybdopterin<br>Pantothenate<br>Pyridoxine<br>Riboflavin<br>Thioredoxin, glutaredoxin, and glutathione<br>Thiamine<br>Pyrimidine nucleotides                                     | 4-Biosynthesis of cofactors, prosthetic groups, and carriers<br>4.1-Biotin<br>4.2-Folic acid<br>4.3-Heme, porphyrin and cobalamine<br>4.4-Menquinone and ubiquinone<br>4.5-Molybdopterin<br>4.6-Pantothenate and coenzyme A<br>4.7-Pyridoxine<br>4.8-Riboflavin, FMN and FAD<br>4.9-Thioredoxin, glutaredoxin, and glutathione<br>4.10-Thiamine<br>4.11-Pyrimidine nucleotides<br>4.12-Other |
| Central intermediary metabolism                            | Amino sugars<br>Phosphorus compounds<br>Polyamine biosynthesis<br>Other                                                                                                                                                                                          |                                                                                                                                                                                                                                                              | 5-Central intermediary metabolism<br>5.1-Amino sugars<br>5.2-Phosphorus compounds<br>5.3-Polyamine biosynthesis<br>5.4-Other                                                                                                                                                                                                                                                                 |
| Energy metabolism                                          | Aerobic<br>Anaerobic<br>Amino acids and amines<br>ATP-proton motive force interconversion<br>Electron transport<br>Enter-Doudoroff<br>Fermentation<br>Glycolysis/gluconeogenesis<br>Pentose phosphate pathway<br>Sugars<br>TCA cycle<br>Other                    | Energy metabolism<br>Amino acids and amines<br>ATP-proton motive force interconversion<br>Electron transport<br>Enter-Doudoroff<br>Fermentation<br>Gluconeogenesis<br>Pentose phosphate pathway<br>Sugars<br>TCA cycle<br>Other                              | 6-Energy metabolism<br>6.1-Aerobic<br>6.2-Amino acids and amines<br>6.3-Anaerobic<br>6.4-ATP-proton motive force interconversion<br>6.5-Electron transport<br>6.6-Enter-Doudoroff<br>6.7-Fermentation<br>6.8-Glycolysis/gluconeogenesis<br>6.9-Pentose phosphate pathway<br>6.10-Sugars<br>6.11-TCA cycle<br>6.12-Other                                                                      |
| Transport and binding proteins                             | Amino acids, peptides and amines<br>Anions<br>Carbohydrates, organic alcohols, and acids<br>Cations<br>Nucleosides, purines, and pyrimidines<br>Other<br>Unknown substrate<br>DNA replication, recombination, and repair                                         | Transport and binding proteins<br>Amino acids, peptides and amines<br>Anions<br>Carbohydrates, organic alcohols, and acids<br>Cations<br>General<br>Nucleosides, purines, and pyrimidines<br>all members of this group<br>all members of this group          | 7-Transport and binding proteins<br>7.1-Amino acids, peptides and amines<br>7.2-Anions<br>7.3-Carbohydrates, organic alcohols, and acids<br>7.4-Cations<br>7.5-Nucleosides, purines, and pyrimidines<br>7.6-Other<br>7.7-Unknown substrate<br>8.1-DNA replication, recombination, and repair                                                                                                 |
| DNA metabolism                                             | Restriction/modification<br>Degradation of DNA<br>Chromosome-associated proteins<br>Degradation of RNA<br>DNA-dependent RNA polymerase<br>Transcription factors                                                                                                  | <b>DNA replication, modification, recombination, and repair</b><br>all members of this group                                                                                                                                                                 | 8-DNA metabolism<br>8.2-Restriction/modification<br>8.3-Degradation of DNA<br>8.4-Chromosome-associated proteins<br>9.1-Degradation of RNA<br>9.2-DNA-dependent RNA polymerase<br>9.3-Transcription factors                                                                                                                                                                                  |
| Transcription                                              | Degradation of RNA<br>DNA-dependent RNA polymerase<br>Transcription factors                                                                                                                                                                                      | Degradation of RNA<br>DNA-dependent RNA polymerase<br>Transcription factors                                                                                                                                                                                  | 9-Transcription                                                                                                                                                                                                                                                                                                                                                                              |

Table 1 - Differences in functional classification between TIGR (strain 26695), AstraZeneca (Strain J99) and PyloriGene database

|                      |                                                                                                                                                                                                                                                                                                                                                                       |                                                                                    |                                                                                                                                                                                                                                                                                   |                         |                                                                                                                                                                                                                                                    |
|----------------------|-----------------------------------------------------------------------------------------------------------------------------------------------------------------------------------------------------------------------------------------------------------------------------------------------------------------------------------------------------------------------|------------------------------------------------------------------------------------|-----------------------------------------------------------------------------------------------------------------------------------------------------------------------------------------------------------------------------------------------------------------------------------|-------------------------|----------------------------------------------------------------------------------------------------------------------------------------------------------------------------------------------------------------------------------------------------|
| Protein synthesis    | RNA processing<br>RNA aminoacylation<br>Nucleoproteins<br>Ribosomal proteins: synthesis and modification<br>tRNA and rRNA base modification<br>Translation factors<br>Other<br>Protein and peptide secretion, and trafficking<br>Protein modification and repair<br>Protein folding and stabilization<br>Degradation of protein, peptides, and glycopeptides<br>Other | <b>Translation</b>                                                                 | RNA processing<br>Amino acyl RNA synthetases<br>Nucleoproteins<br>Ribosomal proteins: synthesis and modification<br>tRNA modification<br>Translation factors<br>Protein modification<br>Degradation of protein, peptides, and glycopeptides<br>General<br>Chemotaxis and motility | 10-Protein synthesis    | 9-4-RNA processing<br>10-1-RNA aminoacylation<br>10-2-Nucleoproteins<br>10-3-Ribosomal proteins: synthesis and modification<br>10-4-rRNA and rRNA base modification<br>10-5-Translation factors<br>10-6-Other                                      |
| Protein fate         | Protein and peptide secretion, and trafficking<br>Protein modification and repair<br>Protein folding and stabilization<br>Degradation of protein, peptides, and glycopeptides<br>Other                                                                                                                                                                                | Regulatory functions                                                               | Protein modification<br>Degradation of protein, peptides, and glycopeptides<br>General<br>Chemotaxis and motility                                                                                                                                                                 | 11-Protein fate         | 11-1-Protein and peptide secretion, and trafficking<br>11-2-Protein modification and repair<br>11-3-Protein folding and stabilization<br>11-4-Degradation of protein, peptides, and glycopeptides<br>12-1-General                                  |
| Regulatory functions | Other                                                                                                                                                                                                                                                                                                                                                                 | Regulatory functions                                                               | Chemotaxis and motility                                                                                                                                                                                                                                                           | 12-Regulatory functions | 12-1-General                                                                                                                                                                                                                                       |
| Cell envelope        | Surface structures<br>Biosynthesis of murein sacculus and peptidoglycan<br>Biosynthesis and degradation of surface polysaccharides and lipopolysaccharides<br>Other<br>Cell division<br>Chemotaxis and motility                                                                                                                                                       | Cell envelope                                                                      | Surface structures<br>Murein sacculus and peptidoglycan<br>Surface polysaccharides, lipopolysaccharides, and antigens<br>Membrane and porins<br>Cell division<br>Polyamine biosynthesis                                                                                           | 13-Cell envelope        | 13-1-Lipoproteins<br>13-2-Surface structures<br>13-3-Biosynthesis of murein sacculus and peptidoglycan<br>13-4-Biosynthesis of surface polysaccharides and lipopolysaccharides<br>13-5-Other<br>14-1-Cell division<br>14-2-Chemotaxis and motility |
| Cellular processes   | Cell division<br>Chemotaxis and motility<br>Detoxification<br>DNA transformation<br>Toxin production and resistance<br>Pathogenesis<br>Adaptation and atypical conditions<br>Other                                                                                                                                                                                    | Cellular processes                                                                 | Detoxification<br><b>DNA transfer and Cag pathogenicity island</b><br>Cell killing<br>Chaperones<br>Protein and peptide secretion<br>General<br>Phosphorus compounds<br><b>Urea</b><br><b>Transposable elements</b>                                                               | 14-Cellular processes   | 14-3-Detoxification<br>14-4-Transformation<br>14-5-Toxin production and resistance<br>14-6-Pathogenesis<br>14-7-Adaptation and atypical conditions<br>14-8-Other                                                                                   |
| Other categories     | Plasmid-related functions<br>Transposon-related functions<br>General<br>Conserved                                                                                                                                                                                                                                                                                     | Conserved with no known function<br><i>Hpilori</i> specific with no known function | Transposable elements                                                                                                                                                                                                                                                             | 15-Other categories     | 15-1-Plasmid-related functions<br>15-2-Transposon-related functions<br>16-1-General<br>17-1-Conserved<br>17-2- <i>Hpilori</i> specific with no known function                                                                                      |
| Unknown function     |                                                                                                                                                                                                                                                                                                                                                                       | Conserved with no known function                                                   |                                                                                                                                                                                                                                                                                   | 16-Unknown              |                                                                                                                                                                                                                                                    |
| Hypothetical         |                                                                                                                                                                                                                                                                                                                                                                       | <i>Hpilori</i> specific with no known function                                     |                                                                                                                                                                                                                                                                                   | 17-Hypothetical         |                                                                                                                                                                                                                                                    |

Blue boxes indicate categories or sub-categories that were either merged into one single sub-category or fragmented into two or several (sub-) categories by comparison to the other functional classifications.

Gray boxes indicate sub-categories classified in a different category but kept intact compared to the other annotation efforts. Red boxes indicate missing categories or sub-categories from one of the functional classifications.

Table 2 - CDS with new assignments or re-assignments of function

| CDS                    | Biological function                                                                   | Proposed gene name | Original functional category with <i>AstraZeneca</i> <sup>a</sup> | Reassigned functional category | Basis for the proposed function <sup>b</sup> |
|------------------------|---------------------------------------------------------------------------------------|--------------------|-------------------------------------------------------------------|--------------------------------|----------------------------------------------|
|                        |                                                                                       |                    |                                                                   |                                |                                              |
| HP0037.1/JHP0033.1     | DNA transformation competence protein                                                 | <i>comb7</i>       | n.a.                                                              | 14.4                           | <i>H. pylori</i>                             |
| HP0045/JHP0039         | GDP-fucose synthetase (previously <b>annotated as</b> nodulation protein Nolk)        | <i>fel</i>         | 13.4                                                              | 2.5                            | <i>H. pylori</i>                             |
| HP0049/JHP0042         | Non-functional type II restriction endonuclease                                       | -                  | 17.1                                                              | 8.2                            | <i>H. pylori</i>                             |
| HP0066/JHP0061         | Predicted ATP-binding protein                                                         | -                  | 17.1                                                              | 16.1                           | by similarity                                |
| HP0086/JHP0079         | Malate:quinone oxidoreductase                                                         | <i>mgo</i>         | 17.1                                                              | 6.11                           | <i>H. pylori</i>                             |
| HP0089/JHP0082         | Predicted 5'-methylthioadenosine/S-adenosylhomocysteine nucleosidase                  | <i>min</i>         | 17.1                                                              | 5.4                            | by similarity                                |
| HP0102/JHP0094         | Predicted glycosyl transferase                                                        | -                  | 17.1                                                              | 13.4                           | by similarity                                |
| HP0105/JHP0097         | Autoinducer-2 synthase                                                                | <i>luxS</i>        | 17.1                                                              | 12.1                           | <i>H. pylori</i>                             |
| HP0111/JHP0103         | Predicted heat-inducible transcription repressor                                      | <i>hrcA</i>        | 17.1                                                              | 12.1                           | by similarity                                |
| HP0112/JHP0104         | Predicted L-fucose-1-phosphate aldolase                                               | <i>fucA</i>        | 17.2                                                              | 13.4                           | by similarity                                |
| HP0160/JHP0148         | Cysteine-rich protein D                                                               | <i>hepD</i>        | 17.1                                                              | 16.1                           | <i>H. pylori</i>                             |
| HP0211/JHP0197         | Cysteine-rich protein A                                                               | <i>hepA</i>        | 17.1                                                              | 16.1                           | <i>H. pylori</i>                             |
| HP0216/JHP0202         | Predicted 1-deoxyxylulose-5-phosphate reductoisomerase                                | <i>dxr</i>         | 17.1                                                              | 4.12                           | by similarity                                |
| HP0217/JHP0203         | Predicted β-1,4-N-acetylglactosamyltransferase                                        | <i>cglA</i>        | 17.2                                                              | 13.4                           | by similarity                                |
| HP0228/JHP0213         | Predicted sulfate permease                                                            | -                  | 17.1                                                              | 7.2                            | by similarity                                |
| HP0233/JHP0218         | Predicted glutathioneperoxidase synthetase                                            | <i>gsp</i>         | 17.1                                                              | 5.3                            | by similarity                                |
| HP0235/JHP0220         | Cysteine-rich protein E                                                               | <i>hepE</i>        | 17.1                                                              | 16.1                           | <i>H. pylori</i>                             |
| HP0262/JHP0246/JHP0247 | Non-functional type II restriction endonuclease                                       | -                  | 17.1                                                              | 8.2                            | <i>H. pylori</i>                             |
| HP0291/JHP0276         | Predicted chorismate mutase                                                           | <i>pheA</i>        | 17.1                                                              | 1.1                            | by similarity                                |
| HP0309/JHP0294         | Predicted N-carbamoyl-D-amino acid amidohydrolase                                     | -                  | 17.1                                                              | 1.6                            | by similarity                                |
| HP0320/JHP0303         | Sec-independent protein translocase protein                                           | <i>tatA</i>        | 17.1                                                              | 11.1                           | <i>H. pylori</i>                             |
| HP0335/JHP0336         | Cystein-rich protein B                                                                | <i>hepB</i>        | 17.1                                                              | 16.1                           | by similarity                                |
| HP0347/JHP0321         | Predicted ribosomal large subunit pseudouridine synthase D                            | <i>rluDI</i>       | 17.1                                                              | 10.4                           | by similarity                                |
| HP0368/JHP1013         | Non-functional type II restriction endonuclease                                       | -                  | 17.2                                                              | 8.2                            | <i>H. pylori</i>                             |
| HP0396/JHP0985         | Predicted 3-o-octaprenyl-4-hydroxybenzoate carboxy-lyase                              | <i>ubiD</i>        | 17.1                                                              | 4.4                            | by similarity                                |
| HP0400/JHP0981         | Predicted ADP hydrolase (previously <b>annotated as</b> lysis tolerance protein LytB) | <i>ispH</i>        | 12.1                                                              | 4.12                           | by similarity                                |
| HP0404/JHP0977         | Predicted S-adenosylmethionine-dependent methyltransferase                            | -                  | 14.8                                                              | 2.4                            | by similarity                                |
| HP0419/JHP0965         | Predicted DNA transformation competence (Comb8 homologue)                             | -                  | 17.1                                                              | 16.1                           | by similarity                                |
| HP0439                 | Predicted DNA helicase                                                                | -                  | 17.2                                                              | 14.4                           | by similarity                                |
| HP0447                 | Predicted DNA helicase                                                                | -                  | 17.1                                                              | 8.1                            | by similarity                                |
| HP0479/JHP0431         | Non-functional type II restriction endonuclease                                       | -                  | 17.2                                                              | 8.2                            | <i>H. pylori</i>                             |
| HP0482/JHP0434         | Non-functional type II restriction endonuclease                                       | -                  | 17.2                                                              | 8.2                            | <i>H. pylori</i>                             |
| HP0484/JHP0436         | Non-functional type II restriction endonuclease                                       | -                  | 17.2                                                              | 8.2                            | <i>H. pylori</i>                             |
| HP0485/JHP0437         | Predicted catalase-like protein                                                       | -                  | 17.1                                                              | 14.3                           | by similarity                                |
| HP0511                 | Lipoprotein Lpp, urease enhancing factor                                              | <i>lpp</i>         | 17.1                                                              | 13.1                           | <i>H. pylori</i>                             |
| HP0553/JHP0500         | Predicted 23S rRNA methyltransferase                                                  | <i>msrR</i>        | 17.1                                                              | 10.4                           | by similarity                                |
| HP0602/JHP0549         | 3-methyladenine DNA glycosylase (previously <b>annotated as</b> an endonuclease III)  | <i>magIII</i>      | 8.2                                                               | 8.1                            | <i>H. pylori</i>                             |
| HP0605/JHP0552         | Outer membrane protein of the HeFA3C efflux system                                    | <i>hefA</i>        | 17.1                                                              | 7.7                            | <i>H. pylori</i>                             |
| HP0625/JHP0569         | Predicted 1-hydroxy-2-methyl-2-(E)-butenyl 4-diphosphate synthetase                   | <i>ispG</i>        | 17.1                                                              | 4.12                           | by similarity                                |
| HP0627/JHP0628/JHP0571 | Cysteine-rich protein F                                                               | <i>hepF</i>        | 17.2                                                              | 16.1                           | <i>H. pylori</i>                             |
| HP0639/JHP0582         | Predicted trans-regulatory protein                                                    | <i>exsB</i>        | 17.1                                                              | 12.1                           | by similarity                                |
| HP0667/JHP0668/JHP0612 | Remnant of type I restriction-modification polypeptide                                | <i>llaGI</i>       | 17.1                                                              | 8.2                            | by similarity                                |

Table 2 - CDS with new assignments or re-assignments of function

|                               |                                                                                                                      |              |      |          |                  |
|-------------------------------|----------------------------------------------------------------------------------------------------------------------|--------------|------|----------|------------------|
| HP0669/JHP0613                | Remnant of type I restriction-modification polypeptide                                                               | <i>llaGI</i> | 17.2 | 8.2      | by similarity    |
| HP0691/JHP0637                | Succinyl-CoA-transferase subunit A (previously <b>annotated as</b> involved in phospholipid synthesis: <i>scdA</i> ) | <i>scdA</i>  | 3.1  | 6.11     | <i>H. pylori</i> |
| HP0692/JHP0636                | Succinyl-CoA-transferase subunit B (previously <b>annotated as</b> involved in phospholipid synthesis: <i>scdB</i> ) | <i>scdB</i>  | 3.1  | 6.11     | <i>H. pylori</i> |
| HP0731/JHP0668                | Predicted <i>LeoA</i> required for secretion of heat-labile enterotoxin ( <i>E. coli</i> H10407)                     | <i>leoA</i>  | 17.2 | 14.6     | by similarity    |
| HP0745/JHP0682                | Predicted ribosomal large subunit pseudouridine synthase D                                                           | <i>rluD2</i> | 17.1 | 10.4     | by similarity    |
| HP0747/JHP0684                | Predicted S-adenosylmethionine-dependent methyltransferase                                                           | -            | 17.1 | 16.1     | by similarity    |
| HP0759/JHP0696                | Predicted DNA-damage inducible multidrug efflux protein                                                              | <i>norM</i>  | 17.1 | 14.7     | by similarity    |
| HP0776/JHP0713                | Predicted RNA polymerase omega chain                                                                                 | <i>rpoZ</i>  | 17.2 | 9.2      | by similarity    |
| HP0785/JHP0722                | Predicted outer membrane lipoprotein carrier protein                                                                 | <i>lola</i>  | 17.1 | 11.1     | by similarity    |
| HP0787/JHP0724                | Predicted lipoprotein releasing system                                                                               | <i>lalc</i>  | 17.1 | 11.1     | by similarity    |
| HP0792/JHP0728                | Predicted DNA transformation competence (maybe be involved in recombination)                                         | <i>comM</i>  | 17.1 | 14.4     | by similarity    |
| HP0810/JHP0746                | Predicted N-6 adenine methyltransferase                                                                              | -            | 17.1 | 8.2      | by similarity    |
| HP0831/JHP0770                | Predicted dephospho-CoA kinase                                                                                       | <i>coaE</i>  | 17.1 | 4.6      | by similarity    |
| HP0834/JHP0773                | Predicted GTP-binding protein                                                                                        | <i>engA</i>  | 17.1 | 16.1     | by similarity    |
| HP0840/JHP0778                | UDP-GlcNAc C6 dehydratase/C4 reductase (previously <b>annotated as</b> putative sugar nucleotide biosynthesis)       | <i>flaAI</i> | 13.4 | 2.5/13.4 | <i>H. pylori</i> |
| HP0890/JHP0823                | Predicted short-chain oxidoreductase                                                                                 | <i>vllc</i>  | 17.1 | 6.12     | by similarity    |
| HP0891/JHP0824                | Predicted acyl coenzyme A thioesterase                                                                               | <i>vllD</i>  | 17.1 | 3.1      | by similarity    |
| HP0909/JHP0845                | Non-functional type II restriction endonuclease                                                                      | -            | 17.2 | 8.2      | <i>H. pylori</i> |
| HP0944/JHP0879                | Predicted regulator of purine biosynthesis                                                                           | <i>ybbJ</i>  | 17.1 | 12.1     | by similarity    |
| HP0956/JHP0890                | Predicted ribosomal large subunit pseudouridine synthase C                                                           | <i>rluC</i>  | 17.1 | 10.4     | by similarity    |
| HP0964/HP0965/JHP0898/JHP0899 | Predicted ATP/GTP-binding protein (pseudogene)                                                                       | -            | 17.2 | 16.1     | by similarity    |
| HP0977/JHP0911                | Predicted peddyl-L-prolyl cis-isomerase D                                                                            | <i>ppid</i>  | 17.1 | 11.2     | by similarity    |
| HP1020/JHP0404                | Predicted bifunctional MEP cytidyltransferase/MECPs involved in isoprenoid synthesis                                 | <i>ispDF</i> | 17.1 | 4.12     | by similarity    |
| HP1022/JHP0402                | Predicted 5'-3' exonuclease                                                                                          | -            | 17.2 | 8.1      | by similarity    |
| HP1053/JHP0372                | Predicted septum site-directing protein                                                                              | <i>minC</i>  | 17.2 | 14.1     | by similarity    |
| HP1060/JHP0365                | Predicted Sec-independent protein translocase protein                                                                | <i>tafB</i>  | 17.2 | 11.1     | by similarity    |
| HP1061/JHP0364                | Predicted Sec-independent protein translocase protein                                                                | <i>tafC</i>  | 17.1 | 11.1     | by similarity    |
| HP1082/JHP0343                | Predicted lipid A and glycerophospholipid transporter (previously <b>annotated as</b> a MDR protein)                 | <i>msbA</i>  | 7.6  | 7.6      | by similarity    |
| HP1098/JHP1024                | Cysteine-rich protein C                                                                                              | <i>hpcC</i>  | 17.1 | 16.1     | by similarity    |
| HP1102/JHO1028                | Predicted 6-phosphogluconolactonase (previously <b>annotated as</b> a putative dehydrogenase)                        | <i>pgl</i>   | 6.12 | 6.9      | by similarity    |
| HP1117/JHP1045                | Cystein-rich protein X                                                                                               | <i>hpcX</i>  | 17.1 | 16.1     | by similarity    |
| HP1122/JHP1051                | Anti-sigma 28 factor                                                                                                 | <i>flgM</i>  | 17.2 | 12.1     | <i>H. pylori</i> |
| HP1149/JHP1076                | Predicted 16s rRNA processing protein                                                                                | <i>rimM</i>  | 17.1 | 9.4      | by similarity    |
| HP1185/JHP1111                | Predicted sugar efflux transporter                                                                                   | <i>sofB</i>  | 17.1 | 7.3      | by similarity    |
| HP1215/HP1216/JHP1138         | Predicted organic solvent tolerance protein (previously <b>annotated as</b> involved in outer membrane permeability) | <i>osrA</i>  | 13.5 | 14.5     | by similarity    |
| HP1221/JHP1142                | Predicted undecaprenyl pyrophosphate synthase                                                                        | <i>upps</i>  | 17.1 | 4.12     | by similarity    |
| HP1225/JHP1146                | Predicted Crb integral membrane protein                                                                              | <i>crbB</i>  | 17.1 | 16.1     | by similarity    |
| HP1228/JHP1149                | Predicted diadenosine polyphosphate hydrolase (previously <b>annotated as</b> MutT)                                  | <i>nuuH</i>  | 8.2  | 14.3     | by similarity    |
| HP1238/JHP1159                | Formamidase (previously <b>annotated as</b> a aliphatic amidase)                                                     | <i>amfF</i>  | 6.2  | 6.2      | <i>H. pylori</i> |
| HP1240/JHP1161                | Predicted Maf protein (appears to be involved in septum formation)                                                   | <i>maf</i>   | 17.1 | 16.1     | by similarity    |
| HP1247/JHP1168                | DNA polymerase III delta subunit                                                                                     | <i>holA</i>  | 17.1 | 8.1      | <i>H. pylori</i> |
| HP1285/JHP1205                | Predicted acid phosphatase lipoprotein                                                                               | <i>aphA</i>  | 17.1 | 5.4      | by similarity    |
| HP1330/JHP1250                | Predicted branched-chain amino acid transport protein                                                                | <i>azlD</i>  | 17.1 | 7.1      | by similarity    |
| HP1331/JHP1251                | Predicted branched-chain amino acid transport protein                                                                | <i>azlC</i>  | 17.1 | 7.1      | by similarity    |

Table 2 - CDS with new assignments or re-assignments of function

|                       |                                                                                  |                   |      |      |                  |
|-----------------------|----------------------------------------------------------------------------------|-------------------|------|------|------------------|
| HP1337/JHP1256        | Predicted nicotinate-nucleotide adenylyltransferase                              | <i>nadD</i>       | 17.1 | 4.11 | by similarity    |
| HP1338/JHP1257        | Predicted nickel uptake regulation protein                                       | <i>nikR</i>       | 17.1 | 12.1 | by similarity    |
| HP1351/JHP1270        | Type II restriction endonuclease/Non-functional type II restriction endonuclease | <i>hpyAVR</i> / - | 17.2 | 8.2  | <i>H. pylori</i> |
| HP1353/HP1354/JHP1272 | Predicted adenine-specific DNA methylase                                         | -                 | 17.2 | 8.2  | by similarity    |
| HP1394/JHP1433        | Predicted inorganic polyphosphate/ATP-NAD kinase                                 | <i>ppnK</i>       | 17.1 | 4.11 | by similarity    |
| HP1430/JHP1323        | Predicted ATP/GTP-binding protein                                                | -                 | 17.1 | 16.1 | by similarity    |
| HP1443/JHP1336        | Predicted 4-diphosphocytidylyl-2-C-methyl-D-erythritol kinase                    | <i>ispE</i>       | 17.1 | 4.12 | by similarity    |
| HP1444/JHP1337        | Predicted SSR A-binding protein                                                  | <i>smpB</i>       | 17.1 | 10.6 | by similarity    |
| HP1459/JHP1352        | Predicted ribosomal large subunit pseudouridine synthase B                       | <i>rluB</i>       | 17.1 | 10.4 | by similarity    |
| HP1464/JHP1357        | Predicted ABC transport system substrate binding protein                         | -                 | 17.1 | 7.7  | by similarity    |
| HP1466/JHP1359        | Predicted ABC transport system permease                                          | -                 | 17.1 | 7.7  | by similarity    |
| HP1476/JHP1369        | Predicted aromatic acid decarboxylase (previously annotated as UbiD)             | <i>paalD</i>      | 4.4  | 16.1 | by similarity    |
| HP1482/JHP1375        | Predicted exodeoxyribonuclease VII small subunit                                 | <i>xseB</i>       | 17.2 | 8.3  | by similarity    |
| HP1490/JHP1383        | Predicted TlyC-like hemolysin                                                    | <i>thyC</i>       | 17.1 | 14.5 | by similarity    |
| HP1527/JHP1416        | Periplasmic protein essential for natural competence                             | <i>comH</i>       | 17.2 | 14.4 | <i>H. pylori</i> |
| HP1567/JHP1475        | Predicted GTP-binding protein                                                    | <i>engB</i>       | 17.1 | 14.1 | by similarity    |
| HP1573/JHP1481        | Predicted DNase of the TadD family                                               | <i>tadD</i>       | 17.1 | 8.3  | by similarity    |
| JHP0318               | Cysteine-rich protein H                                                          | <i>hepH</i>       | 17.1 | 16.1 | <i>H. pylori</i> |
| JHP0829               | Predicted virulence-associated protein D                                         | <i>vapD</i>       | 17.2 | 14.6 | by similarity    |
| JHP0921               | Predicted DNA transformation competence (ComB8 homologue)                        | -                 | 17.2 | 14.4 | by similarity    |
| JHP0922/JHP0923       | Predicted DNA transformation competence (ComB9 homologue)                        | -                 | 17.2 | 14.4 | by similarity    |
| JHP1437               | Cysteine-rich protein G                                                          | <i>hepG</i>       | 17.1 | 16.1 | <i>H. pylori</i> |

<sup>a</sup>These CDS were classified in PyloRiGene categories taking only into account the original annotation from AstraZeneca

<sup>b</sup>CDS for which the function has been characterized directly in *H. pylori* are annotated "*H. pylori*". CDS for which the proposed function is based on sequence similarity to proteins characterized in other organisms are annotated "by similarity".

Table 3 - List of CDS pairs that differ in length

| CDS            | gene name                                                                | Frame. Cate. in 26695 | CDS size in 199 | CDS size in 26695 | absolut aa difference | aa difference | comments                                                                                                                                                                   | F  | IF | III |
|----------------|--------------------------------------------------------------------------|-----------------------|-----------------|-------------------|-----------------------|---------------|----------------------------------------------------------------------------------------------------------------------------------------------------------------------------|----|----|-----|
| HP0009/JHP0007 | <i>hopZ</i>                                                              | 17.1                  | 634             | 667               | 33                    | 33            | -33 different start codon due to slipped-strand mispairing mechanism (poly CT track)                                                                                       | 5  |    |     |
| HP0021/JHP0019 |                                                                          | 13.5                  | 190             | 191               | 1                     | 1             | -1 different stop codon due to a nucleotide deletion in JHP0019                                                                                                            | 3a |    |     |
| HP0022/JHP0020 | Predicted integral membrane protein                                      | 17.1                  | 521             | 523               | 2                     | 2             | -2 insertion (natural polymorphism)                                                                                                                                        | 1  |    |     |
| HP0025/JHP0021 | <i>hopD</i>                                                              | 13.5                  | 711             | 690               | 21                    | 21            | 21 deletion (natural polymorphism)                                                                                                                                         | 1  |    |     |
| HP0028/JHP0024 |                                                                          | 17.1                  | 177             | 175               | 2                     | 2             | 2 different start codon with only the alternative second start codon UUG conserved (JHP0024 correct)                                                                       | 2a |    |     |
| HP0030/JHP0026 |                                                                          | 17.2                  | 593             | 565               | 28                    | 28            | 28 deletion (natural polymorphism)                                                                                                                                         | 1  |    |     |
| HP0032/JHP0028 |                                                                          | 17.1                  | 91              | 90                | 1                     | 1             | 1 deletion (natural polymorphism)                                                                                                                                          | 1  |    |     |
| HP0033/JHP0029 | <i>clpA</i>                                                              | 17.1                  | 741             | 742               | 1                     | 1             | -1 insertions and deletions (natural polymorphism)                                                                                                                         | 1  |    |     |
| HP0035/JHP0031 |                                                                          | 17.1                  | 97              | 100               | 3                     | 3             | -3 insertion (natural polymorphism)                                                                                                                                        | 1  |    |     |
| HP0036/JHP0032 |                                                                          | 17.1                  | 334             | 335               | 1                     | 1             | -1 difference due to two consecutive start codon for JHP0032                                                                                                               | 2a |    |     |
| HP0038/JHP0034 | <i>comb8</i>                                                             | 14.4                  | 245             | 247               | 2                     | 2             | -2 insertion (natural polymorphism)                                                                                                                                        | 1  |    |     |
| HP0039/JHP0035 | <i>comb9</i>                                                             | 14.4                  | 90              | 328               | 238                   | 238           | -238 sequencing error from TIGR                                                                                                                                            | 4  |    |     |
| HP0040/JHP0035 | <i>comb9</i>                                                             | 14.4                  | 247             | 328               | 81                    | 81            | -81 sequencing error from TIGR                                                                                                                                             | 4  |    |     |
| HP0041/JHP0036 | <i>comb10</i>                                                            | 14.4                  | 123             | 376               | 253                   | 253           | -253 sequencing error from TIGR                                                                                                                                            | 4  |    |     |
| HP0042/JHP0034 | <i>comb10</i>                                                            | 14.4                  | 233             | 376               | 143                   | 143           | -143 sequencing error from TIGR                                                                                                                                            | 4  |    |     |
| HP0048/JHP0041 | <i>hypF</i>                                                              | 12.1                  | 769             | 757               | 12                    | 12            | 12 different start codon due to a premature stop codon in JHP0041 (a nucleotide substitution)                                                                              | 2b |    |     |
| HP0050/JHP0043 | <i>hypA/ViAM /hypY9Y/M</i>                                               | 8.2                   | 232             | 230               | 2                     | 2             | 2 different stop codon due to point mutations and nucleotide deletions                                                                                                     | 3a |    |     |
| HP0058/JHP0050 |                                                                          | 17.2                  | 0               | 120               | 120                   | 120           | -120 authentic frame-shift                                                                                                                                                 | 4  |    |     |
| HP0058/JHP0051 |                                                                          | 17.2                  | 0               | 120               | 120                   | 120           | -120 authentic frame-shift                                                                                                                                                 | 4  |    |     |
| HP0059/JHP0052 |                                                                          | 17.2                  | 284             | 327               | 43                    | 43            | -43 insertion (natural polymorphism)                                                                                                                                       | 1  |    |     |
| HP0060/JHP0053 |                                                                          | 17.2                  | 813             | 143               | 670                   | 670           | 670 frame-shift or sequencing error                                                                                                                                        | 4  |    |     |
| HP0060/JHP0054 |                                                                          | 17.2                  | 813             | 522               | 291                   | 291           | 291 frame-shift or sequencing error                                                                                                                                        | 4  |    |     |
| HP0060/JHP0055 |                                                                          | 17.2                  | 813             | 78                | 735                   | 735           | 735 frame-shift or sequencing error                                                                                                                                        | 4  |    |     |
| HP0063/JHP0058 |                                                                          | 17.2                  | 496             | 500               | 4                     | 4             | -4 deletions and insertions (natural polymorphism)                                                                                                                         | 1  |    |     |
| HP0066/JHP0061 | Predicted ATP-binding protein                                            | 16.1                  | 831             | 806               | 25                    | 25            | 25 different start codon assignment and deletion                                                                                                                           | 1  |    |     |
| HP0069/JHP0064 | <i>ureF</i>                                                              | 11.3                  | 254             | 256               | 2                     | 2             | -2 insertion (natural polymorphism)                                                                                                                                        | 1  |    | 2a  |
| HP0074/JHP0069 |                                                                          | 11.1                  | 157             | 163               | 6                     | 6             | -6 different stop codon due to a nucleotide insertion in JHP0069 at the 3' end                                                                                             | 3a |    |     |
| HP0078/JHP0073 | <i>lspA</i>                                                              | 13.5                  | 85              | 255               | 170                   | 170           | -170 duplication and insertion of <i>HorA</i> N-ter                                                                                                                        | 6  |    |     |
| HP0079/JHP0073 | <i>horA</i>                                                              | 13.5                  | 595             | 255               | 340                   | 340           | 340 duplication and insertion of <i>HorA</i> N-ter                                                                                                                         | 6  |    |     |
| HP0080/JHP0074 |                                                                          | 17.2                  | 593             | 590               | 3                     | 3             | 3 insertions and a deletion (natural polymorphism)                                                                                                                         | 1  |    |     |
| HP0089/JHP0082 | <i>min</i>                                                               | 5.4                   | 231             | 230               | 1                     | 1             | 1 different start codon assignment (choice between TIGR (AUG) and Astra (GUG) due to consecutive AUG and GUG)                                                              | 2a |    |     |
| HP0091/JHP0084 | <i>hpyA/III</i>                                                          | 8.2                   | 277             | 72                | 205                   | 205           | 205 pseudogene JHP0084                                                                                                                                                     | 6  |    |     |
| HP0093/JHP0086 | <i>facC</i>                                                              | 13.4                  | 146             | 128               | 18                    | 18            | 18 slipped-strand mispairing mechanism due to a poly (C) track                                                                                                             | 5  |    |     |
| HP0094/JHP0086 | <i>facC</i>                                                              | 13.4                  | 155             | 128               | 27                    | 27            | 27 slipped-strand mispairing mechanism due to a poly (C) track                                                                                                             | 5  |    |     |
| HP0102/JHP0094 | Predicted glycosyl transferase                                           | 13.4                  | 259             | 260               | 1                     | 1             | -1 insertion (natural polymorphism)                                                                                                                                        | 1  |    |     |
| HP0103/JHP0095 | <i>ltpB</i>                                                              | 14.2                  | 565             | 564               | 1                     | 1             | 1 difference due to two consecutive start codons for HP0103                                                                                                                | 2a |    |     |
| HP0105/JHP0097 | <i>lacs</i>                                                              | 12.1                  | 155             | 152               | 3                     | 3             | 3 insertion (natural polymorphism)                                                                                                                                         | 1  |    |     |
| HP0107/JHP0099 | <i>cysK</i>                                                              | 1.5                   | 306             | 305               | 1                     | 1             | 1 difference due to two consecutive start codons for HP0107                                                                                                                | 2a |    |     |
| HP0108/JHP0100 |                                                                          | 17.2                  | 186             | 152               | 34                    | 34            | 34 different start codon due to a nucleotide insertion generating a premature stop codon at the 5' end of the gene and 3' end polymorphism generating different stop codon | 2b |    | 3b  |
| HP0110/JHP0102 |                                                                          | 11.3                  | 189             | 191               | 2                     | 2             | -2 insertion (natural polymorphism)                                                                                                                                        | 1  |    |     |
| HP0111/JHP0103 | <i>grpE</i>                                                              | 12.1                  | 276             | 266               | 10                    | 10            | 10 different start codon assignment (199 start codon appears to be correct)                                                                                                | 2a |    |     |
| HP0112/JHP0104 | <i>hrcA</i>                                                              | 13.4                  | 231             | 212               | 19                    | 19            | 19 different start codon assignment                                                                                                                                        | 2a |    |     |
| HP0114/JHP0106 | <i>facA</i>                                                              | 17.1                  | 628             | 627               | 1                     | 1             | 1 difference due to two consecutive start codons for HP0114                                                                                                                | 2a |    |     |
| HP0118/JHP0110 |                                                                          | 17.2                  | 395             | 412               | 17                    | 17            | -17 deletion (natural polymorphism)                                                                                                                                        | 1  |    |     |
| HP0129/JHP0118 |                                                                          | 17.2                  | 141             | 143               | 2                     | 2             | -2 insertion (natural polymorphism)                                                                                                                                        | 1  |    |     |
| HP0130/JHP0119 |                                                                          | 17.2                  | 286             | 285               | 1                     | 1             | 1 deletion (natural polymorphism)                                                                                                                                          | 1  |    |     |
| HP0143/JHP0131 | Predicted C(4)-dicarboxylates and tetracarboxylates/succinate antiporter | 7.3                   | 0               | 482               | 482                   | 482           | -482 regulated by slipped-strand mispairing mechanism (poly A track)                                                                                                       | 5  |    |     |
| HP0146/JHP0134 | <i>fixQ</i>                                                              | 6.5                   | 73              | 72                | 1                     | 1             | 1 difference due to two consecutive start codon for HP0146                                                                                                                 | 2a |    |     |
| HP0147/JHP0135 | <i>fixP</i>                                                              | 6.5                   | 286             | 292               | 6                     | 6             | -6 C-ter frame-shift due to a nucleotide difference creating an extended C-ter                                                                                             | 3a |    |     |
| HP0149/JHP0137 |                                                                          | 17.2                  | 194             | 197               | 3                     | 3             | -3 insertions (natural polymorphism)                                                                                                                                       | 1  |    |     |
| HP0150/JHP0138 |                                                                          | 17.2                  | 196             | 193               | 3                     | 3             | 3 different stop codon due to natural polymorphism of the 3' end                                                                                                           | 2b |    |     |
| HP0151/JHP0139 | Predicted membrane protein                                               | 17.1                  | 270             | 255               | 15                    | 15            | 15 different start codon due to a nucleotide insertion in JHP0139                                                                                                          | 3b |    |     |
| HP0156/JHP0144 |                                                                          | 17.1                  | 200             | 198               | 2                     | 2             | 2 both genes have two start codons (AUG and GUG). HP0156 uses AUG and JHP0144 GUG                                                                                          | 2a |    |     |
| HP0159/JHP0147 | <i>fixJ1</i>                                                             | 13.4                  | 372             | 377               | 5                     | 5             | -5 insertion (natural polymorphism)                                                                                                                                        | 1  |    |     |

Table 3 - List of CDS pairs that differ in length

|                |                                                    |      |      |      |     |    |                                                                                                                                                                                        |    |
|----------------|----------------------------------------------------|------|------|------|-----|----|----------------------------------------------------------------------------------------------------------------------------------------------------------------------------------------|----|
| HP0160/JHP0148 | <i>hcpD</i>                                        | 16.1 | 306  | 305  | 1   | 1  | 1 deletion (natural polymorphism)                                                                                                                                                      | 1  |
| HP0164/JHP0151 | histidine kinase sensor                            | 12.1 | 254  | 442  | 188 | 5  | -188 slipped-strand mispairing mechanism due to a poly (C) track                                                                                                                       | 5  |
| HP0165/JHP0151 | histidine kinase sensor                            | 12.1 | 173  | 442  | 269 | 5  | -269 slipped-strand mispairing mechanism due to a poly (C) track                                                                                                                       | 5  |
| HP0170/JHP0156 |                                                    | 17.1 | 253  | 243  | 10  | 1  | 10 deletion (natural polymorphism)                                                                                                                                                     | 1  |
| HP0172/JHP0158 | <i>moeA</i>                                        | 4.5  | 391  | 390  | 1   | 1  | 1 deletion (natural polymorphism)                                                                                                                                                      | 1  |
| HP0174/JHP0160 |                                                    | 17.1 | 258  | 242  | 16  | 16 | 16 different start codon due to 5 nucleotides deletion                                                                                                                                 | 2c |
| HP0181/JHP0169 |                                                    | 17.1 | 224  | 236  | 12  | 12 | -12 different start codon assignment and insertion                                                                                                                                     | 1  |
| HP0185/JHP0173 |                                                    | 17.2 | 267  | 268  | 1   | 1  | -1 insertion and deletion (natural polymorphism)                                                                                                                                       | 1  |
| HP0186/JHP0174 |                                                    | 17.2 | 404  | 567  | 163 | 4  | -163 frame-shift or sequencing error                                                                                                                                                   | 4  |
| HP0187/JHP0174 |                                                    | 17.2 | 95   | 567  | 472 | 4  | -472 frame-shift or sequencing error                                                                                                                                                   | 4  |
| HP0188/JHP0174 |                                                    | 17.2 | 33   | 567  | 534 | 4  | -534 frame-shift or sequencing error                                                                                                                                                   | 4  |
| HP0201/JHP0187 | <i>plaxX</i>                                       | 3.1  | 338  | 339  | 1   | 1  | -1 difference due to two consecutive start codons for HP0201 and deletion (natural polymorphism)                                                                                       | 1  |
| HP0203/JHP0189 |                                                    | 17.2 | 91   | 100  | 9   | 9  | -9 different stop codon due to a nucleotide insertion                                                                                                                                  | 3a |
| HP0205/JHP0191 |                                                    | 17.2 | 793  | 916  | 123 | 1  | -123 extensive insertions and deletions                                                                                                                                                | 1  |
| HP0206/JHP0192 |                                                    | 17.2 | 108  | 85   | 23  | 1  | 23 one insertion and different stop due to TAA codon deletion and a nucleotide deletion in J99                                                                                         | 1  |
| HP0207/JHP0193 | <i>mnp</i>                                         | 16.1 | 412  | 368  | 44  | 2a | 44 different start codon assignment (corrected for HP0207 by SWISSProt)                                                                                                                | 2a |
| HP0208/JHP0194 | <i>rfaD2</i>                                       | 13.4 | 0    | 394  | 394 | 5  | -394 regulated by slipped-strand mispairing mechanism (poly AG track)                                                                                                                  | 5  |
| HP0209/JHP0195 | <i>hopA</i>                                        | 13.5 | 450  | 438  | 12  | 2a | 12 different start codon assignment (Astra considers J99 start codon as the correct one)                                                                                               | 2a |
| HP0212/JHP0198 | <i>dapE</i>                                        | 1.2  | 383  | 388  | 5   | 1  | -5 deletion (natural polymorphism)                                                                                                                                                     | 1  |
| HP0214/JHP0200 | Predicted sodium-dependent transporter             | 7.7  | 552  | 548  | 4   | 4  | 4 deletion (natural polymorphism)                                                                                                                                                      | 1  |
| HP0217/JHP0203 | <i>gtaA</i>                                        | 13.4 | 380  | 385  | 5   | 5  | -5 insertion and deletion (natural polymorphism). Also regulated by slipped-strand mispairing mechanism (two poly G tracks). JHP0203 was adjusted artificially by Astra to give 385 aa | 1  |
| HP0219/JHP0205 |                                                    | 17.2 | 159  | 161  | 2   | 1  | -2 two consecutive alternative start codons (UUG and GUG) and an insertion. HP0219 uses the second start codon and JHP0205 the first.                                                  | 2a |
| HP0222/JHP0208 |                                                    | 17.2 | 73   | 86   | 13  | 3a | -13 different stop codon due to a nucleotide substitution without changing the frame of lecture                                                                                        | 3a |
| HP0223/JHP0209 | <i>rada</i>                                        | 8.1  | 456  | 448  | 8   | 2a | 8 different start codon assignment correct for HP0223 by SWISSProt                                                                                                                     | 2a |
| HP0227/JHP0212 | <i>hopM</i>                                        | 13.5 | 691  | 696  | 5   | 1  | -5 insertions and deletions (natural polymorphism)                                                                                                                                     | 1  |
| HP0228/JHP0213 | Predicted sulfate permease                         | 7.2  | 390  | 385  | 5   | 2a | 5 difference due to a start codon not conserved in JHP0213                                                                                                                             | 2a |
| HP0238/JHP0223 | <i>proS</i>                                        | 10.1 | 577  | 576  | 1   | 1  | 1 deletion (natural polymorphism)                                                                                                                                                      | 1  |
| HP0247/JHP0232 | <i>decD</i>                                        | 10.5 | 492  | 491  | 1   | 1  | 1 deletion (natural polymorphism)                                                                                                                                                      | 1  |
| HP0252/JHP0237 | <i>hopF</i>                                        | 13.5 | 252  | 237  | 15  | 1  | 15 deletion (natural polymorphism)                                                                                                                                                     | 1  |
| HP0253/JHP0238 | <i>hopG</i>                                        | 13.5 | 38   | 471  | 433 | 4  | -433 frame-shift or sequencing error                                                                                                                                                   | 4  |
| HP0254/JHP0238 | <i>hopG</i>                                        | 13.5 | 431  | 471  | 40  | 4  | -40 frame-shift or sequencing error                                                                                                                                                    | 4  |
| HP0257/JHP0241 |                                                    | 17.1 | 219  | 222  | 3   | 1  | -3 insertion (natural polymorphism)                                                                                                                                                    | 1  |
| HP0258/JHP0242 |                                                    | 17.1 | 348  | 351  | 3   | 1  | -3 insertion (natural polymorphism) and difference due to two consecutive start codons, corrected by SWISSProt for JHP0242                                                             | 1  |
| HP0260/JHP0244 | <i>hpyORF260/hpyORF1244M</i>                       | 8.2  | 384  | 390  | 6   | 2a | -6 different stop codon due to the stop codon deletion in JHP0244                                                                                                                      | 2a |
| HP0261/JHP0245 |                                                    | 17.2 | 132  | 152  | 20  | 3b | -20 N-ter polymorphism (only C-ter located 38 aa are homologous)                                                                                                                       | 3b |
| HP0262/JHP0246 | Non-functional type II restriction endonuclease    | 8.2  | 200  | 172  | 28  | 2c | 28 different start codon (corrected by PIR for HP0262) and frame-shift or sequencing error at the C-ter                                                                                | 2c |
| HP0262/JHP0247 | Non-functional type II restriction endonuclease    | 8.2  | 200  | 69   | 131 | 3a | 131 frame-shift or sequencing error                                                                                                                                                    | 3a |
| HP0265/JHP0250 | <i>ccfA</i>                                        | 6.5  | 240  | 239  | 1   | 4  | 1 difference due to two consecutive start codons for HP0265                                                                                                                            | 4  |
| HP0270/JHP0255 |                                                    | 17.1 | 162  | 217  | 55  | 2a | -55 different start codon assignment                                                                                                                                                   | 2a |
| HP0279/JHP0264 | <i>wacC</i>                                        | 17.1 | 340  | 336  | 4   | 1  | 4 deletion (natural polymorphism)                                                                                                                                                      | 1  |
| HP0282/JHP0267 |                                                    | 17.1 | 480  | 478  | 2   | 2a | 2 two almost consecutive start UUG codons. HP0282 uses the first and JHP0267 the second                                                                                                | 2a |
| HP0289/JHP0274 | Predicted toxin-like protein                       | 14.5 | 2893 | 2902 | 9   | 1  | -9 natural polymorphism insertions                                                                                                                                                     | 1  |
| HP0291/JHP0276 | <i>pheA</i>                                        | 1.1  | 96   | 100  | 4   | 1  | -4 insertion (natural polymorphism)                                                                                                                                                    | 1  |
| HP0293/JHP0278 | <i>pubB</i>                                        | 4.2  | 559  | 567  | 8   | 1  | 8-different stop codon due to natural polymorphism of 3' end                                                                                                                           | 1  |
| HP0298/JHP0283 |                                                    | 7.1  | 549  | 546  | 3   | 3b | 3 insertion and deletions (natural polymorphism)                                                                                                                                       | 3b |
| HP0304/JHP0289 | <i>dppA</i>                                        | 17.2 | 329  | 331  | 2   | 1  | -2 insertion (natural polymorphism)                                                                                                                                                    | 1  |
| HP0307/JHP0292 |                                                    | 17.1 | 90   | 92   | 2   | 1  | -2 different start codon due to a nucleotide deletion in JHP0292                                                                                                                       | 1  |
| HP0309/JHP0294 | Predicted N-carboxymyl-D-amino acid amidohydrolase | 1.6  | 292  | 294  | 2   | 2b | -2 insertion (natural polymorphism)                                                                                                                                                    | 2b |
| HP0322/JHP0305 | Predicted poly E-rich protein                      | 16.1 | 505  | 501  | 4   | 1  | 4 deletions and insertions (natural polymorphism)                                                                                                                                      | 1  |
| HP0324/JHP0307 | <i>hopC</i>                                        | 13.5 | 254  | 245  | 9   | 2a | 9 different start codon assignment (for HP0324 corrected by Astra)                                                                                                                     | 2a |
| HP0333/JHP0316 |                                                    | 14.4 | 270  | 266  | 4   | 2a | 4 difference due to an alternative start codon GUG not conserved in JHP0316                                                                                                            | 2a |
| HP0337/JHP0319 |                                                    | 17.2 | 101  | 112  | 11  | 1  | -11 insertion (natural polymorphism)                                                                                                                                                   | 1  |
| HP0338/JHP0320 |                                                    | 17.2 | 188  | 186  | 2   | 1  | 2 deletion (natural polymorphism)                                                                                                                                                      | 1  |
| HP0347/JHP0321 | <i>hldJ</i>                                        | 10.4 | 298  | 293  | 5   | 2c | 5 different stop codon due to natural polymorphism of 3' end                                                                                                                           | 2c |
| HP0350/JHP0324 |                                                    | 17.2 | 222  | 220  | 2   | 1  | 2 deletion (natural polymorphism)                                                                                                                                                      | 1  |
| HP0366/JHP1015 | Predicted sugar nucleotide biosynthesis            | 2.5  | 375  | 378  | 3   | 3a | -3 different stop codon due to two nucleotide deletions and a nucleotide substitution                                                                                                  | 3a |
| HP0367/JHP1014 |                                                    | 17.2 | 202  | 201  | 1   | 1  | 1 insertion and deletion (natural polymorphism)                                                                                                                                        | 1  |

Table 3 - List of CDS pairs that differ in length

|                  |                                                                    |      |      |      |      |                                                                                                                                             |         |
|------------------|--------------------------------------------------------------------|------|------|------|------|---------------------------------------------------------------------------------------------------------------------------------------------|---------|
| HP0368/JHP1013   | Non-functional type II restriction endonuclease                    | 8.2  | 133  | 182  | 49   | -49 different start codon due to a poly (A) track (7 and 8, respectively). Insertion of a A nucleotide for HP0368 gives genes of same size) | 5       |
| HP0369/JHP1012   | Non-functional site-specific adenine methyltransferase             | 8.2  | 236  | 320  | 84   | -84 different start codon due to extensive N-ter polymorphism (both are inactive forms of a typeII R-M system)                              | 2c      |
| HP0370/JHP1011   | <i>accC</i>                                                        | 3.1  | 458  | 455  | 3    | 3 difference due to two start codons for HP0370 (AUG and GUG) with only one AUG for JHP1011 which corresponds to the GUG of HP0370          | 2a      |
| HP0371/JHP1010   | <i>accB</i>                                                        | 3.1  | 156  | 161  | 5    | -5 deletions (natural polymorphism)                                                                                                         | 1       |
| HP0372/JHP1009   | <i>acd</i>                                                         | 2.1  | 190  | 188  | 2    | 2 different start codon assignment (correct for HP0372 by SWISSProt)                                                                        | 2a      |
| HP0373/JHP1008   | <i>homC</i>                                                        | 13.5 | 700  | 751  | 51   | -51 insertion (natural polymorphism)                                                                                                        | 1       |
| HP0376/JHP0291   | <i>hemH</i>                                                        | 4.3  | 334  | 335  | 1    | -1 different stop codon due to a nucleotide deletion in JHP0291 at the 3'end                                                                | 3a      |
| HP0377/JHP1004   | Predicted DsxC-like protein                                        | 16.1 | 221  | 223  | 2    | -2 insertion (natural polymorphism)                                                                                                         | 1       |
| HP0379/JHP1002   | <i>furA</i>                                                        | 13.4 | 425  | 435  | 10   | -10 deletions and insertions with a natural polymorphism of the last 15 aa (also regulated by slipped-strand mispairing mechanism)          | 1 3b 5  |
| HP0384/JHP0997   |                                                                    | 17.2 | 250  | 248  | 2    | 2 deletion (natural polymorphism)                                                                                                           | 1       |
| HP0385/JHP0996   |                                                                    | 17.2 | 76   | 75   | 1    | 1 difference due to two consecutive start codons for HP0385                                                                                 | 2a      |
| HP0392/JHP0989   | <i>cheA</i>                                                        | 14.2 | 803  | 815  | 12   | -12 insertion (natural polymorphism)                                                                                                        | 1       |
| HP0393/JHP0988   | <i>cheV3</i>                                                       | 14.2 | 311  | 312  | 1    | -1 insertion (natural polymorphism)                                                                                                         | 1       |
| HP0398/JHP0983   |                                                                    | 17.2 | 182  | 170  | 12   | 12 deletion (natural polymorphism)                                                                                                          | 1       |
| HP0399/JHP0982   | <i>psfI</i>                                                        | 10.3 | 556  | 552  | 4    | 4 deletion (natural polymorphism)                                                                                                           | 1       |
| HP0408/JHP0973   |                                                                    | 17.2 | 162  | 164  | 2    | -2 deletion and different stop codon (natural polymorphism)                                                                                 | 1 3b    |
| HP0427/JHP0952   |                                                                    | 17.1 | 111  | 63   | 48   | 48 different start and stop codons due to natural polymorphism                                                                              | 2c 3b   |
| HP0463/JHP0415   | <i>hscMI</i>                                                       | 8.2  | 487  | 543  | 56   | -56 different stop codon due to a nucleotide insertion (C-ter extension)                                                                    | 3a      |
| HP0464/JHP0416   | <i>hscRI</i>                                                       | 8.2  | 1055 | 0    | 1055 | -1055 regulated by slipped-strand mispairing mechanism (poly C track)                                                                       | 5       |
| HP0477/JHP0429   | <i>hopI</i>                                                        | 13.5 | 367  | 371  | 4    | -4 insertions (natural polymorphism of N-ter)                                                                                               | 1       |
| HP0481/JHP0433   | Non-functional type II adenine specific DNA methyltransferase      | 8.2  | 211  | 309  | 98   | -98 different stop codon due to a nucleotide insertion (both are inactive forms of a typeII R-M system)                                     | 3a      |
| HP0482/JHP0434   | Non-functional type II restriction endonuclease                    | 8.2  | 170  | 175  | 5    | -5 different stop codon due to a nucleotide insertion in JHP0434 at the 3'end and a nucleotide substitution                                 | 3a      |
| HP0483/JHP0435   | <i>hpy99X/M</i>                                                    | 8.2  | 0    | 351  | 351  | -351 authentic frame-shift                                                                                                                  | 4       |
| HP0484/JHP0436   | Non-functional ACGT site-specific type II restriction endonuclease | 8.2  | 250  | 184  | 66   | 66 different start codon due to a nucleotide substitution generating a premature stop codon                                                 | 2b      |
| HP0487/JHP0440   | <i>hojD</i>                                                        | 13.5 | 480  | 465  | 15   | 15 different start codon assignment (Astra considers J99 start codon the correct one)                                                       | 2a      |
| HP0488/JHP0441   |                                                                    | 17.2 | 957  | 912  | 45   | 45 different start due to natural polymorphism and deletions                                                                                | 1 2c    |
| HP0492/JHP0444   | Predicted neuraminylactose-binding hemagglutinin                   | 17.1 | 295  | 181  | 114  | 114 one N-ter codon deletion and different stop codon due to C-ter polymorphism                                                             | 2c 3b   |
| HP0502/JHP0454   |                                                                    | 13.2 | 278  | 282  | 4    | -4 insertions (natural polymorphism)                                                                                                        | 1       |
| HP0503/JHP0454   |                                                                    | 17.2 | 54   | 343  | 289  | -289 frame-shift or sequencing error                                                                                                        | 4       |
| HP0504/JHP0455   |                                                                    | 17.2 | 246  | 343  | 97   | -97 frame-shift or sequencing error                                                                                                         | 4       |
| HP0505/JHP0455   |                                                                    | 17.1 | 49   | 251  | 202  | -202 frame-shift or sequencing error                                                                                                        | 4       |
| HP0506/JHP0456   | Predicted outer membrane protein                                   | 13.5 | 154  | 251  | 97   | -97 frame-shift or sequencing error                                                                                                         | 4       |
| HP0508/JHP0458   |                                                                    | 17.1 | 452  | 450  | 2    | -2 insertion and deletion (natural polymorphism)                                                                                            | 1       |
| HP0513/JHP0462   |                                                                    | 17.1 | 658  | 706  | 48   | 48 different start codon assignment with deletions and insertions                                                                           | 1 2a    |
| HP0514/JHP0463   | <i>mpl9</i>                                                        | 10.3 | 150  | 149  | 1    | 1 difference due to two consecutive start codons for HP1313                                                                                 | 2a      |
| HP0517/JHP0466   | <i>era</i>                                                         | 14.8 | 302  | 301  | 1    | 1 difference due to two consecutive start codons for HP0517                                                                                 | 2a      |
| HP0519/JHP0468   |                                                                    | 17.2 | 276  | 283  | 7    | -7 insertion (natural polymorphism)                                                                                                         | 1       |
| HP0521/JHP0470   | <i>caq2</i>                                                        | 14.6 | 80   | 219  | 139  | -139 Insertion resulting in a longer protein with a different start for JHP0470 and a frame-shift truncating the C-ter of HP0521            | 1 2c 3a |
| HP0527/JHP0476   | <i>caqY</i>                                                        | 14.6 | 1927 | 1819 | 108  | 108 insertions and deletions (natural polymorphism)                                                                                         | 1       |
| HP0534/JHP0482   | <i>caq5</i>                                                        | 14.6 | 196  | 199  | 3    | -3 different stop codon due to one nucleotide substitution extending the 3' end by 3 extra codons                                           | 3a      |
| HP0545/JHP0493   | <i>caqD</i>                                                        | 14.6 | 207  | 208  | 1    | -1 insertion (natural polymorphism)                                                                                                         | 1       |
| HP0547/JHP0495   | <i>caqA</i>                                                        | 14.6 | 1186 | 1167 | 19   | 19 deletion (natural polymorphism)                                                                                                          | 1       |
| HP0552/JHP0499   |                                                                    | 17.1 | 287  | 289  | 2    | -2 different stop codon; two codons insertion at the 3' end (natural polymorphism)                                                          | 3b      |
| HP0564/JHP0511   |                                                                    | 13.2 | 56   | 81   | 25   | -25 different start codon assignment (incorrect reassignment by PIR for HP0564)                                                             | 2a      |
| HP0567/JHP0514   | Predicted outer membrane protein                                   | 17.2 | 348  | 349  | 1    | 1 difference due to a TGT insertion before the stop in JHP0514                                                                              | 3a      |
| HP0579/JHP0526   |                                                                    | 17.2 | 184  | 183  | 1    | 1 different stop codon due to a nucleotide substitution in JHP0526                                                                          | 3a      |
| HP0582/JHP0529   | <i>tonB1</i>                                                       | 7.4  | 324  | 317  | 7    | 7 deletion (natural polymorphism)                                                                                                           | 1       |
| HP0585/JHP0532   | <i>nhl</i>                                                         | 218  | 218  | 214  | 4    | 4 difference due to an alternative start codon GUG not conserved in JHP0532 and a deletion (natural polymorphism)                           | 1 2a    |
| HP0585.1/JHP0533 |                                                                    | 17.1 | 76   | 78   | 2    | -2 different stop codon due to natural polymorphism of the 3'end of the genes                                                               | 3b      |
| HP0586/JHP0534   |                                                                    | 17.2 | 977  | 978  | 1    | -1 deletion and different stop codon due to a nucleotide deletion at the 3' end of HP0586                                                   | 1 3a    |
| HP0591/JHP0539   | <i>oorC</i>                                                        | 6.11 | 186  | 184  | 2    | 2 different stop codon due to last three codons replaced by one single codon                                                                | 3b      |
| HP0597/JHP0544   | <i>phpA</i>                                                        | 13.3 | 659  | 660  | 1    | -1 insertion (natural polymorphism)                                                                                                         | 1       |
| HP0600/JHP0547   | <i>spbB</i>                                                        | 7.7  | 593  | 589  | 4    | 4 difference due to an AUG start codon not conserved in JHP0547                                                                             | 2a      |



Table 3 - List of CDS pairs that differ in length

|                        |      |      |           |      |                                                                                                                                                                                                                    |        |
|------------------------|------|------|-----------|------|--------------------------------------------------------------------------------------------------------------------------------------------------------------------------------------------------------------------|--------|
| HP0603/JHP0550         | 17.2 | 189  | 205       | 16   | -16 different start codon assignment (HP0603 start is not conserved in JHP0550)                                                                                                                                    | 2a     |
| HP0608/JHP0555         | 17.2 | 160  | 189       | 29   | -29 different start codon assignment                                                                                                                                                                               | 2a     |
| HP0610/JHP0556         | 14.5 | 1238 | 3194      | 1956 | -1956 frame-shift or sequencing error                                                                                                                                                                              | 4      |
| HP0611/JHP0299         | 14.5 | 1943 | 3194      | 1251 | -1251 frame-shift or sequencing error                                                                                                                                                                              | 4      |
| HP0612/JHP0299         | 7.7  | 166  | 251       | 85   | -85 frame-shift or sequencing error                                                                                                                                                                                | 4      |
| HP0614/JHP0557         | 7.7  | 79   | 251       | 172  | -172 frame-shift or sequencing error                                                                                                                                                                               | 4      |
| HP0617/JHP0560         | 17.2 | 111  | 110       | 1    | 1 difference due to two consecutive start codon for HP0614                                                                                                                                                         | 2a     |
| HP0619/JHP0563         | 10.1 | 577  | 579       | 2    | -2 difference due to two codon insertion at the 3' end of JHP0560                                                                                                                                                  | 3b     |
| <b>JHP0627/JHP0571</b> | 16.1 | 0    | 268       | 268  | -268 regulated by slipped-strand mispairing (poly C track)                                                                                                                                                         | 5      |
| <b>JHP0628/JHP0571</b> | 16.1 | 110  | 110 (352) | 268  | <b>JHP0571 coordinates have been modified (352 aa to 110 aa). Duplicate of HP0627 with an extension</b>                                                                                                            | 6      |
| HP0629/JHP0572         | 16.1 | 225  | 110       | 115  | 115 JHP0571 coordinates have been modified (352 aa to 110 aa). Duplicate of HP0627 with an extension                                                                                                               | 1      |
| HP0636/JHP0579         | 17.2 | 92   | 137       | 45   | -45 different stop codon due to a nucleotide insertion (C-extension) and insertion                                                                                                                                 | 1 3a   |
| HP0638/JHP0581         | 13.5 | 305  | 307       | 2    | -2 insertion (natural polymorphism). Also regulated by slipped-strand mispairing mechanism: both genes are on:                                                                                                     | 1      |
| HP0639/JHP0582         | 12.1 | 226  | 225       | 1    | -1 different stop codon due to natural polymorphism of the 3' end of the genes                                                                                                                                     | 3b     |
| HP0641/JHP0584         | 17.1 | 75   | 167       | 92   | -92 different stop codon (extensive natural polymorphism)                                                                                                                                                          | 3b     |
| HP0650/JHP0595         | 17.2 | 196  | 209       | 13   | -13 different start codon assignment                                                                                                                                                                               | 2a     |
| HP0651/JHP0596         | 13.4 | 476  | 454       | 22   | -22 deletion (natural polymorphism) (Also regulated by slipped-strand mispairing mechanism)                                                                                                                        | 1      |
| HP0655/JHP0600         | 13.5 | 916  | 906       | 10   | 10 deletion (natural polymorphism)                                                                                                                                                                                 | 1      |
| HP0656/JHP0601         | 17.1 | 383  | 353       | 30   | 30 different start codon due to a nucleotide substitution in JHP0601 that eliminates a premature stop codon                                                                                                        | 2b     |
| HP0657/JHP0602         | 11.4 | 432  | 435       | 3    | -3 insertion (natural polymorphism)                                                                                                                                                                                | 1      |
| HP0658/JHP0603         | 10.6 | 475  | 474       | 1    | 1 difference due to two consecutive start codons for HP0658                                                                                                                                                        | 1      |
| HP0659/JHP0604         | 17.2 | 414  | 413       | 1    | 1 insertion and deletion (natural polymorphism)                                                                                                                                                                    | 2a     |
| HP0660/JHP0605         | 17.1 | 338  | 335       | 3    | 3 difference due to two codons insertion at the 3' end                                                                                                                                                             | 1      |
| HP0662/JHP0607         | 9.4  | 240  | 239       | 1    | 1 difference due to two consecutive start codon for HP0662                                                                                                                                                         | 3b     |
| HP0667/JHP0612         | 8.2  | 85   | 450       | 365  | -365 ancestral of a type III R-M system (HP0667/HP0668/HP0669 and JHP0612/HP0613)                                                                                                                                  | 2a     |
| HP0668/JHP0612         | 8.2  | 607  | 450       | 157  | 157 ancestral of a type III R-M system (HP0667/HP0668/HP0669 and JHP0612/HP0613)                                                                                                                                   | 6      |
| HP0669/JHP0613         | 8.2  | 933  | 1167      | 234  | -234 ancestral of a type III R-M system (HP0667/HP0668/HP0669 and JHP0612/HP0613)                                                                                                                                  | 6      |
| HP0675/JHP0617         | 8.1  | 362  | 356       | 6    | 6 deletion (natural polymorphism)                                                                                                                                                                                  | 1      |
| HP0678/JHP0620         | 13.4 | 36   | 315       | 279  | -279 different stop codons between HP0679 and JHP0620 without changing the frame of lecture (nucleotide substitution)                                                                                              | 3a     |
| HP0679/JHP0620         | 13.4 | 289  | 315       | 26   | -26 different stop codons without changing the frame of lecture (nucleotide substitution) but which splits HP0678 ; 3a                                                                                             | 3a     |
| HP0682/JHP0623         | 17.2 | 126  | 116       | 10   | 10 different start codon assignment. HP0682 codon is not conserved in JHP0623                                                                                                                                      | 2a     |
| HP0684/JHP0625         | 13.2 | 105  | 248       | 143  | -143 slipped-strand mispairing mechanism due to a poly (C) track                                                                                                                                                   | 5      |
| HP0685/JHP0625         | 13.2 | 172  | 248       | 76   | -76 slipped-strand mispairing mechanism due to a poly (C) track                                                                                                                                                    | 5      |
| HP0688/JHP0628         | 17.1 | 166  | 276       | 110  | -110 frame-shift or sequencing error                                                                                                                                                                               | 4      |
| HP0689/JHP0628         | 17.1 | 96   | 276       | 180  | -180 frame-shift or sequencing error                                                                                                                                                                               | 4      |
| HP0694/JHP0634         | 13.5 | 257  | 336       | 79   | -79 frame-shift for HP0694                                                                                                                                                                                         | 4      |
| HP0695/JHP0633         | 1.6  | 713  | 712       | 1    | 1 deletion (natural polymorphism)                                                                                                                                                                                  | 1      |
| HP0697/JHP0631         | 17.1 | 168  | 166       | 2    | 2 two almost consecutive start AUG codons HP0697 uses the first and JHP0631 the second one                                                                                                                         | 2a     |
| HP0701/JHP0641         | 8.1  | 827  | 828       | 1    | -1 insertion (natural polymorphism)                                                                                                                                                                                | 1      |
| HP0702/JHP0642         | 17.2 | 158  | 157       | 1    | 1 difference due to two consecutive start codons for HP0702                                                                                                                                                        | 2a     |
| HP0705/JHP0644         | 8.1  | 935  | 941       | 6    | -6 different start codon assignment (apparent incorrect assignment of alternative UUG start codon for J99)                                                                                                         | 2a     |
| HP0706/JHP0645         | 13.5 | 273  | 270       | 3    | 3 different start codon assignment (for HP0706 corrected by Astra)                                                                                                                                                 | 2a     |
| HP0710/JHP0649         | 13.5 | 660  | 657       | 3    | 3 deletion (natural polymorphism)                                                                                                                                                                                  | 1      |
| HP0712/JHP0651         | 17.1 | 124  | 234       | 110  | -110 frame-shift or sequencing error                                                                                                                                                                               | 4      |
| HP0713/JHP0651         | 17.1 | 114  | 234       | 120  | -120 frame-shift or sequencing error                                                                                                                                                                               | 4      |
| HP0717/JHP0655         | 8.1  | 578  | 582       | 4    | -4 deletions and insertions (natural polymorphism)                                                                                                                                                                 | 1      |
| HP0719/JHP0657         | 17.2 | 109  | 140       | 31   | -31 frame-shift or sequencing error                                                                                                                                                                                | 4      |
| HP0720/JHP0657         | 17.2 | 53   | 140       | 87   | -87 frame-shift or sequencing error                                                                                                                                                                                | 4      |
| HP0722/JHP0659         | 13.5 | 608  | 600       | 8    | 8 deletions (natural polymorphism) and phase variation (poly CT track - correcting the poly CT track the two proteins still have different sizes of 644 and 638 aa, respectively)                                  | 1 5    |
| HP0723/JHP0661         | 6.2  | 330  | 332       | 2    | -2 insertion (natural polymorphism)                                                                                                                                                                                | 1      |
| HP0725/JHP0662         | 13.5 | 629  | 612       | 17   | 17 deletion, different start codon assignment and regulation by slipped-strand mispairing mechanism (poly CT track - correcting the track still gives two proteins of different size 653 and 651 aa, respectively) | 1 2a 5 |
| HP0728/JHP0665         | 17.1 | 336  | 338       | 2    | -2 different start codon with only the alternative first start codon UUG conserved (JHP0665 correct)                                                                                                               | 2a     |
| HP0731/JHP0668         | 14.6 | 573  | 569       | 4    | 4 different stop codon due to one nucleotide insertion                                                                                                                                                             | 3a     |
| HP0732/JHP0669         | 17.2 | 118  | 371       | 253  | -253 HP0732/HP0733 and JHP0669/JHP0670 appear to have decayed from an ancestor protein                                                                                                                             | 6      |
| HP0733/JHP0670         | 17.2 | 521  | 192       | 329  | 329 HP0732/HP0733 and JHP0669/JHP0670 appear to have decayed from an ancestor protein                                                                                                                              | 6      |
| HP0744/JHP0681         | 17.2 | 0    | 303       | 303  | -303 regulated by slipped-strand mispairing mechanism (poly AG track)                                                                                                                                              | 5      |

Table 3 - List of CDS pairs that differ in length

| HP0747/JHP0684 | Probable S-adenosylmethionine-dependent methyltransferase | 16.1     | 393  | 400  | 7   | -7 different stop codon; C-ter extension in J99 due to a G deletion                                                                          | 3a |
|----------------|-----------------------------------------------------------|----------|------|------|-----|----------------------------------------------------------------------------------------------------------------------------------------------|----|
| HP0752/JHP0689 | <i>hfd</i>                                                | 13.2     | 674  | 685  | 11  | -11 different start codon assignment (for HP752 corrected by SWISSProt giving a 685 aa protein)                                              | 2a |
| HP0755/JHP0694 | Predicted moeB/hif family protein                         | 4.5/4.10 | 210  | 235  | 25  | -22 different start codon assignment and stop codon (natural polymorphism)                                                                   | 2a |
| HP0760/JHP0697 |                                                           | 17.1     | 462  | 529  | 67  | -67 different start codon assignment (corrected form HP0760 by SWISSProt)                                                                    | 2a |
| HP0764/JHP0701 |                                                           | 17.2     | 428  | 117  | 311 | 311 HP0764/HP0765 and JHP0701/JHP0702/JHP0703 appear to have decayed from an ancestral protein                                               | 6  |
| HP0764/JHP0702 |                                                           | 17.2     | 428  | 168  | 260 | 260 HP0764/HP0765 and JHP0701/JHP0702/JHP0703 appear to have decayed from an ancestral protein                                               | 6  |
| HP0765/JHP0703 |                                                           | 17.2     | 102  | 286  | 184 | -184 HP0764/HP0765 and JHP0701/JHP0702/JHP0703 appear to have decayed from an ancestral protein                                              | 6  |
| HP0766/JHP0704 |                                                           | 17.2     | 274  | 182  | 92  | 92 different start and stop codons (extensive polymorphism)                                                                                  | 3b |
| HP0769/JHP0706 | <i>mobA</i>                                               | 4.5      | 201  | 209  | 8   | -8 different stop codon due to a nucleotide substitution                                                                                     | 2a |
| HP0772/JHP0709 | <i>amiA</i>                                               | 13.3     | 440  | 469  | 29  | -29 insertion (natural polymorphism)                                                                                                         | 3a |
| HP0775/JHP0712 | <i>spoZ</i>                                               | 12.1     | 775  | 776  | 1   | -1 different start codon due to one nucleotide substitution in JHP0712                                                                       | 1  |
| HP0776/JHP0713 | <i>spoZ</i>                                               | 9.2      | 84   | 74   | 10  | 10 different start codon assignment (J99 start codon appears the correct one)                                                                | 3a |
| HP0779/JHP0716 | <i>acrB</i>                                               | 6.11     | 853  | 852  | 1   | 1 difference due to two consecutive start codons for HP0779 corrected by SWISSProt                                                           | 2a |
| HP0780/JHP0717 |                                                           | 17.2     | 90   | 88   | 2   | 2 difference due to different start codons: HP0780 has almost two consecutive GUG while JHP0717 has only AUG corresponding to the second GUG | 2a |
| HP0783/JHP0720 |                                                           | 17.2     | 165  | 175  | 10  | -10 different start codon assignment (J99 start codon appears the correct one)                                                               | 2a |
| HP0784/JHP0721 |                                                           | 17.2     | 44   | 43   | 1   | 1 difference due to two consecutive alternative start codons for HP0784 with only the second one conserved in JHP0721                        | 2a |
| HP0794/JHP0730 | <i>clpP</i>                                               | 11.4     | 196  | 195  | 1   | 1 difference due to two consecutive start codon for HP0974                                                                                   | 2a |
| HP0801/JHP0737 | <i>moaD</i>                                               | 4.5      | 74   | 73   | 1   | 1 difference due to two consecutive start codon for HP0801                                                                                   | 2a |
| HP0805/JHP0741 | Predicted LPS biosynthesis protein                        | 13.4     | 284  | 292  | 8   | -8 different start codon assignment (HP0805 start appears to be the correct one) and natural polymorphism of C-ter                           | 3b |
| HP0807/JHP0743 | <i>fecA2</i>                                              | 7.4      | 787  | 792  | 5   | -5 different stop codon due to a nucleotide deletion for JHP0743                                                                             | 3a |
| HP0818/JHP0754 | <i>proWX</i>                                              | 7.1      | 553  | 161  | 392 | 392 HP0818 is homologous to JHP0757 (553 aa) and JHP0754 (truncated duplication)                                                             | 6  |
| HP0833/JHP0772 |                                                           | 17.2     | 292  | 296  | 4   | -4 insertion (natural polymorphism of C-ter)                                                                                                 | 1  |
| HP0834/JHP0773 | <i>engA</i>                                               | 16.1     | 458  | 462  | 4   | -4 insertion (natural polymorphism)                                                                                                          | 1  |
| HP0836/JHP0775 |                                                           | 17.1     | 119  | 201  | 82  | -82 frame-shift or sequencing error                                                                                                          | 4  |
| HP0837/JHP0775 |                                                           | 17.1     | 102  | 201  | 99  | -99 frame-shift or sequencing error                                                                                                          | 4  |
| HP0843/JHP0781 | <i>thiE</i>                                               | 17.1     | 102  | 201  | 99  | 2 insertion and deletion (natural polymorphism)                                                                                              | 1  |
| HP0844/JHP0782 | <i>thiD</i>                                               | 4.10     | 219  | 217  | 2   | 1 difference due to two consecutive GUG start codons in HP0844 with only the second conserved in JHP0782                                     | 2a |
| HP0845/JHP0783 | <i>thiM</i>                                               | 4.10     | 273  | 259  | 14  | 14 different start codon assignment (correct by SWISSProt for HP0845)                                                                        | 2a |
| HP0846/JHP0784 | <i>hscR2</i>                                              | 8.2      | 866  | 875  | 9   | -9 insertions (natural polymorphism)                                                                                                         | 1  |
| HP0848/JHP0785 | <i>hscD2</i>                                              | 8.2      | 298  | 207  | 91  | 91 HP848/HP849 are duplication of JHP785 with rearrangements                                                                                 | 6  |
| HP0849/JHP0785 | <i>hscS2</i>                                              | 8.2      | 96   | 207  | 111 | -111 HP848/HP849 are duplication of JHP785                                                                                                   | 6  |
| HP0850/JHP0786 | <i>hscM2</i>                                              | 8.2      | 527  | 528  | 1   | -1 insertion at the 5' end and deletion at the 3' end                                                                                        | 2c |
| HP0851/JHP0787 |                                                           | 17.1     | 227  | 228  | 1   | 1 difference due to replacement of two last codons by three new ones in JHP787 (natural polymorphism)                                        | 3b |
| HP0854/JHP0790 | <i>gucC</i>                                               | 2.4      | 327  | 325  | 2   | 2 different start codons almost consecutive (AUG, UUG and GUG for HP0854) and (GUG, AUG and GUG for JHP0790)                                 | 2a |
| HP0858/JHP0792 | <i>flaE</i>                                               | 2.5/13.4 | 461  | 463  | 2   | -2 insertion (natural polymorphism)                                                                                                          | 1  |
| HP0859/JHP0793 | <i>flaD</i>                                               | 2.5/13.4 | 330  | 329  | 1   | 1 deletion (natural polymorphism)                                                                                                            | 1  |
| HP0860/JHP0794 |                                                           | 17.1     | 173  | 174  | 1   | -1 difference due to replacement of the second codon by two new ones in JHP0794 (natural polymorphism)                                       | 2c |
| HP0861/JHP0795 |                                                           | 17.1     | 246  | 245  | 1   | 1 different stop codon due to 3' end natural polymorphism                                                                                    | 3b |
| HP0863/JHP0797 |                                                           | 17.2     | 542  | 541  | 1   | 1 insertion and deletion (natural polymorphism)                                                                                              | 1  |
| HP0874/JHP0808 |                                                           | 17.2     | 291  | 292  | 1   | -1 insertion (natural polymorphism)                                                                                                          | 1  |
| HP0878/JHP0812 |                                                           | 17.2     | 57   | 243  | 186 | -186 frame-shift or sequencing error                                                                                                         | 4  |
| HP0879/JHP0812 |                                                           | 17.2     | 202  | 243  | 41  | -41 frame-shift or sequencing error                                                                                                          | 4  |
| HP0885/JHP0817 | <i>mwjN</i>                                               | 14.6     | 461  | 460  | 1   | 1 difference due to two consecutive start codons for HP0885                                                                                  | 2a |
| HP0887/JHP0819 | <i>vacA</i>                                               | 14.5     | 1290 | 1288 | 2   | 2 deletion (natural polymorphism)                                                                                                            | 1  |
| HP0890/JHP0843 | <i>vilC</i>                                               | 6.12     | 256  | 271  | 15  | -15 different start codon assignment (orthologues from other strains are 284 aa long)                                                        | 2a |
| HP0896/JHP1164 | <i>babB (hopT)</i>                                        | 13.5     | 708  | 703  | 5   | 5 different start codon due to slipped-strand mispairing mechanism (poly CT track)                                                           | 5  |
| HP0899/JHP0836 | <i>hycC</i>                                               | 11.3     | 77   | 78   | 1   | -1 difference in stop codon due to a nucleotide deletion in JHP0836                                                                          | 3a |
| HP0901/JHP0838 |                                                           | 17.2     | 41   | 42   | 1   | -1 different stop due to 3' end natural polymorphism                                                                                         | 3b |
| HP0903/JHP0840 | <i>ackA</i>                                               | 6.7      | 0    | 403  | 403 | -403 authentic frame-shift                                                                                                                   | 4  |
| HP0904/JHP0841 | <i>pta</i>                                                | 6.7      | 0    | 519  | 519 | -519 frame-shift of <i>pta</i> gene (HP0903/HP0904) in 26695?                                                                                | 4  |
| HP0905/JHP0841 | <i>pta</i>                                                | 6.7      | 223  | 519  | 296 | -296 frame-shift of <i>pta</i> gene (HP0905/HP0904) in 26695?                                                                                | 4  |
| HP0906/JHP0842 |                                                           | 17.2     | 527  | 524  | 3   | 3 several insertions and deletions (natural polymorphism)                                                                                    | 1  |
| HP0907/JHP0843 | <i>figD</i>                                               | 13.2     | 301  | 363  | 62  | -62 different stop codon (C-ter extension) and insertion                                                                                     | 1  |
| HP0909/JHP0845 | Non-functional type II restriction endonuclease           | 8.2      | 201  | 193  | 8   | 8 insertions (natural polymorphism)                                                                                                          | 1  |
| HP0910/JHP0846 | <i>hpy8M</i>                                              | 8.2      | 379  | 381  | 2   | -2 difference due to two close UUG start codons (HP0846 uses the first and HP0910 uses the second)                                           | 3a |

Table 3 - List of CDS pairs that differ in length

| HP ID          | Gene                                                              | Start | End  | Length | Notes | HP ID          | Gene                                                              | Start | End  | Length                                                     | Notes                                                                                                                                    |
|----------------|-------------------------------------------------------------------|-------|------|--------|-------|----------------|-------------------------------------------------------------------|-------|------|------------------------------------------------------------|------------------------------------------------------------------------------------------------------------------------------------------|
| HP0911/JHP0847 | <i>pcrA</i>                                                       | 8.1   | 675  | 676    |       | HP0912/JHP0848 | <i>pcrA</i>                                                       | 8.1   | 675  | 676                                                        |                                                                                                                                          |
| HP0912/JHP0848 | <i>hopC</i>                                                       | 13.5  | 515  | 520    |       | HP0913/JHP0849 | <i>hopB</i>                                                       | 13.5  | 529  | 527                                                        | -1 insertion (natural polymorphism)                                                                                                      |
| HP0913/JHP0849 | <i>hopB</i>                                                       | 13.5  | 529  | 527    |       | HP0915/JHP0851 | <i>hspB2</i>                                                      | 7.4   | 562  | 562                                                        | 2 deletion (natural polymorphism)                                                                                                        |
| HP0915/JHP0851 | <i>hspB2</i>                                                      | 7.4   | 562  | 562    |       | HP0916/JHP0851 | <i>hspB2</i>                                                      | 7.4   | 249  | 815                                                        | -253 frame-shift or sequencing error                                                                                                     |
| HP0916/JHP0851 | <i>hspB2</i>                                                      | 7.4   | 249  | 815    |       | HP0922/JHP0856 | Predicted toxin-like protein                                      | 14.5  | 2529 | 2399                                                       | -566 frame-shift or sequencing error                                                                                                     |
| HP0922/JHP0856 | Predicted toxin-like protein                                      | 14.5  | 2529 | 2399   |       | HP0923/JHP0857 | <i>hopX</i>                                                       | 13.5  | 369  | 366                                                        | 130 deletion (natural polymorphism)                                                                                                      |
| HP0923/JHP0857 | <i>hopX</i>                                                       | 13.5  | 369  | 366    |       | HP0927/JHP0861 | <i>hpxX</i>                                                       | 11.3  | 326  | 310                                                        | 3 deletion (natural polymorphism)                                                                                                        |
| HP0927/JHP0861 | <i>hpxX</i>                                                       | 11.3  | 326  | 310    |       | HP0928/JHP0862 | <i>folE</i>                                                       | 4.2   | 180  | 180                                                        | 16 different start codon assignment corrected for HP0927 by SWISSProt                                                                    |
| HP0928/JHP0862 | <i>folE</i>                                                       | 4.2   | 180  | 180    |       | HP0931/JHP0866 |                                                                   | 17.2  | 146  | 146                                                        | HP0928 has two homologues, JHP0862 (truncated duplication) and JHP863 (full protein)                                                     |
| HP0931/JHP0866 |                                                                   | 17.2  | 146  | 146    |       | HP0932/JHP0866 | <i>prpP</i>                                                       | 7.1   | 100  | 219                                                        | -119 frame-shift or sequencing error                                                                                                     |
| HP0932/JHP0866 | <i>prpP</i>                                                       | 7.1   | 100  | 219    |       | HP0936/JHP0871 |                                                                   | 17.2  | 389  | 452                                                        | -63 different start codon assignment corrected for HP0936 by PIR                                                                         |
| HP0936/JHP0871 |                                                                   | 17.2  | 389  | 452    |       | HP0937/JHP0872 |                                                                   | 17.1  | 264  | 274                                                        | -10 HP0937/JHP0938 and JHP0872/JHP0873 appear to have decayed from an ancestral protein                                                  |
| HP0937/JHP0872 |                                                                   | 17.1  | 264  | 274    |       | HP0938/JHP0873 |                                                                   | 17.1  | 115  | 291                                                        | -176 HP0937/JHP0938 and JHP0872/JHP0873 appear to have decayed from an ancestral protein                                                 |
| HP0938/JHP0873 |                                                                   | 17.1  | 115  | 291    |       | HP0940/JHP0875 | Predicted amino acid ABC transporter, periplasmic binding protein | 7.1   | 256  | 257                                                        | -1 insertion (natural polymorphism)                                                                                                      |
| HP0940/JHP0875 | Predicted amino acid ABC transporter, periplasmic binding protein | 7.1   | 256  | 257    |       | HP0951/JHP0885 |                                                                   | 17.1  | 496  | 493                                                        | 3 different stop codon due to a nucleotide deletion                                                                                      |
| HP0951/JHP0885 |                                                                   | 17.1  | 496  | 493    |       | HP0955/JHP0889 |                                                                   | 205   | 204  | 1 difference due to two consecutive start codon for HP0951 |                                                                                                                                          |
| HP0955/JHP0889 |                                                                   | 205   | 204  | 204    |       | HP0958/JHP0892 | <i>lgt</i>                                                        | 11.1  | 284  | 283                                                        | 1 different stop codon due to nucleotide substitution. JHP0889 has two consecutive stop codons                                           |
| HP0958/JHP0892 | <i>lgt</i>                                                        | 11.1  | 284  | 283    |       | HP0960/JHP0894 | <i>glyQ</i>                                                       | 17.1  | 254  | 267                                                        | -13 C-ter extension of four EESQ repeats                                                                                                 |
| HP0960/JHP0894 | <i>glyQ</i>                                                       | 17.1  | 254  | 267    |       | HP0963/JHP0896 |                                                                   | 10.1  | 303  | 298                                                        | 5 different stop codon due to a nucleotide substitution                                                                                  |
| HP0963/JHP0896 |                                                                   | 10.1  | 303  | 298    |       | HP0963/JHP0896 |                                                                   | 17.2  | 447  | 230                                                        | 217 HP0963 and JHP0896/JHP0897 appear to have decayed from an ancestral protein. Note that JHP0896 was annotated as an orphan CDS of 199 |
| HP0963/JHP0896 |                                                                   | 17.2  | 447  | 230    |       | HP0963/JHP0897 |                                                                   | 17.2  | 447  | 226                                                        | 221 HP0963 and JHP0896/JHP0897 appear to have decayed from an ancestral protein. Note that JHP0896 was annotated as an orphan CDS of 199 |
| HP0963/JHP0897 |                                                                   | 17.2  | 447  | 226    |       | HP0964/JHP0898 | Predicted ATP/GTP-binding protein                                 | 17.1  | 363  | 244                                                        | 119 HP0964/JHP0965 and JHP0898/JHP0899 appear to have decayed from an ancestral protein                                                  |
| HP0964/JHP0898 | Predicted ATP/GTP-binding protein                                 | 17.1  | 363  | 244    |       | HP0965/JHP0899 | Predicted ATP/GTP-binding protein                                 | 17.1  | 363  | 500                                                        | -137 HP0964/JHP0965 and JHP0898/JHP0899 appear to have decayed from an ancestral protein                                                 |
| HP0965/JHP0899 | Predicted ATP/GTP-binding protein                                 | 17.1  | 363  | 500    |       | HP0966/JHP0900 |                                                                   | 17.1  | 443  | 500                                                        | -57 HP0966/JHP0965 and JHP0898/JHP0899 appear to have decayed from an ancestral protein                                                  |
| HP0966/JHP0900 |                                                                   | 17.1  | 443  | 500    |       | HP0966/JHP0901 |                                                                   | 17.1  | 549  | 340                                                        | 209 frame-shift or sequencing error                                                                                                      |
| HP0966/JHP0901 |                                                                   | 17.1  | 549  | 340    |       | HP0968/JHP0902 |                                                                   | 17.1  | 549  | 166                                                        | 383 frame-shift or sequencing error                                                                                                      |
| HP0968/JHP0902 |                                                                   | 17.1  | 549  | 166    |       | HP0969/JHP0903 | <i>ctcA1</i>                                                      | 17.2  | 21   | 93                                                         | -72 frame-shift or sequencing error                                                                                                      |
| HP0969/JHP0903 | <i>ctcA1</i>                                                      | 17.2  | 21   | 93     |       | HP0971/JHP0905 |                                                                   | 7.4   | 1020 | 1019                                                       | 1 difference due to two consecutive start codon for HP0969                                                                               |
| HP0971/JHP0905 |                                                                   | 7.4   | 1020 | 1019   |       | HP0973/JHP0907 |                                                                   | 17.2  | 413  | 431                                                        | -18 different start codon assignment                                                                                                     |
| HP0973/JHP0907 |                                                                   | 17.2  | 413  | 431    |       | HP0976/JHP0910 | <i>bioA</i>                                                       | 4.1   | 336  | 362                                                        | -9 insertions (natural polymorphism)                                                                                                     |
| HP0976/JHP0910 | <i>bioA</i>                                                       | 4.1   | 336  | 362    |       | HP0978/JHP0912 | <i>fsxA</i>                                                       | 17.2  | 492  | 493                                                        | -3 different stop codon due to a nucleotide deletion in JHP0910 at the 3' end                                                            |
| HP0978/JHP0912 | <i>fsxA</i>                                                       | 17.2  | 492  | 493    |       | HP0990/JHP0938 |                                                                   | 17.2  | 222  | 416                                                        | -194 different start codon due to insertion creating an in-frame extended N-ter of JHP0938                                               |
| HP0990/JHP0938 |                                                                   | 17.2  | 222  | 416    |       | HP0991/JHP0939 |                                                                   | 17.2  | 209  | 337                                                        | -128 different start codon due to a poly (A) track and a nucleotide deletion                                                             |
| HP0991/JHP0939 |                                                                   | 17.2  | 209  | 337    |       | HP0992/JHP0939 |                                                                   | 17.2  | 79   | 337                                                        | -258 different start codon due to a poly (A) track and a nucleotide deletion                                                             |
| HP0992/JHP0939 |                                                                   | 17.2  | 79   | 337    |       | HP0995/JHP0941 |                                                                   | 8.1   | 355  | 331                                                        | 24 different start codon with N-ter first 100 aa not homologous                                                                          |
| HP0995/JHP0941 |                                                                   | 8.1   | 355  | 331    |       | HP0996/JHP0942 |                                                                   | 17.2  | 600  | 677                                                        | -77 different start codon assignment; JHP0942 start is not conserved in 26695                                                            |
| HP0996/JHP0942 |                                                                   | 17.2  | 600  | 677    |       | HP1012/JHP0411 | Predicted integrase/recombinase XerCD family                      | 17.2  | 444  | 443                                                        | 1 deletion (natural polymorphism)                                                                                                        |
| HP1012/JHP0411 | Predicted integrase/recombinase XerCD family                      | 17.2  | 444  | 443    |       | HP1015/JHP0408 | Predicted zinc metalloprotease                                    | 11.4  | 168  | 202                                                        | -34 different start codon assignment (correct for HP1015 by PIR)                                                                         |
| HP1015/JHP0408 | Predicted zinc metalloprotease                                    | 11.4  | 168  | 202    |       | HP1017/JHP0406 |                                                                   | 7.1   | 519  | 475                                                        | 44 different start codon assignment (HP1017 ALG is not conserved in JHP0406)                                                             |
| HP1017/JHP0406 |                                                                   | 7.1   | 519  | 475    |       | HP1018/JHP0405 | <i>rocE</i>                                                       | 11.4  | 48   | 476                                                        | -428 HP1018 and HP1019 are split due to a nucleotide deletion                                                                            |
| HP1018/JHP0405 | <i>rocE</i>                                                       | 11.4  | 48   | 476    |       | HP1019/JHP0405 | <i>htrA</i>                                                       | 11.4  | 443  | 476                                                        | -33 HP1018 and HP1019 are split due to a nucleotide deletion                                                                             |
| HP1019/JHP0405 | <i>htrA</i>                                                       | 11.4  | 443  | 476    |       | HP1020/JHP0404 | <i>htrA</i>                                                       | 4.12  | 406  | 409                                                        | -3 insertion (natural polymorphism)                                                                                                      |
| HP1020/JHP0404 | <i>htrA</i>                                                       | 4.12  | 406  | 409    |       | HP1022/JHP0402 | Predicted 5'-3' exonuclease                                       | 8.1   | 278  | 288                                                        | -10 different start codon assignment (J99 start codon appears to be the correct one)                                                     |
| HP1022/JHP0402 | Predicted 5'-3' exonuclease                                       | 8.1   | 278  | 288    |       | HP1028/JHP0396 |                                                                   | 17.2  | 165  | 167                                                        | -2 insertion (natural polymorphism)                                                                                                      |
| HP1028/JHP0396 |                                                                   | 17.2  | 165  | 167    |       | HP1030/JHP0394 | <i>hly</i>                                                        | 14.2  | 287  | 285                                                        | 2 deletion (natural polymorphism)                                                                                                        |
| HP1030/JHP0394 | <i>hly</i>                                                        | 14.2  | 287  | 285    |       | HP1033/JHP0391 |                                                                   | 17.2  | 131  | 91                                                         | 40 different stop codon due several nucleotide substitutions and deletions (natural polymorphism)                                        |
| HP1033/JHP0391 |                                                                   | 17.2  | 131  | 91     |       | HP1035/JHP0389 | <i>hlyF</i>                                                       | 13.2  | 459  | 455                                                        | 4 two consecutive alternative GTG start codons and deletions (natural polymorphism)                                                      |
| HP1035/JHP0389 | <i>hlyF</i>                                                       | 13.2  | 459  | 455    |       | HP1038/JHP0386 | <i>arcD</i>                                                       | 17.1  | 167  | 170                                                        | 1 difference due to two consecutive start codons for HP1042                                                                              |
| HP1038/JHP0386 | <i>arcD</i>                                                       | 17.1  | 167  | 170    |       | HP1042/JHP0382 |                                                                   | 17.1  | 348  | 347                                                        | -3 insertion (natural polymorphism)                                                                                                      |
| HP1042/JHP0382 |                                                                   | 17.1  | 348  | 347    |       | HP1048/JHP0377 | <i>hlyB</i>                                                       | 10.5  | 944  | 949                                                        | 1 difference due to two consecutive start codons for HP1042                                                                              |
| HP1048/JHP0377 | <i>hlyB</i>                                                       | 10.5  | 944  | 949    |       | HP1051/JHP0374 |                                                                   | 17.1  | 140  | 165                                                        | -5 deletion (natural polymorphism)                                                                                                       |
| HP1051/JHP0374 |                                                                   | 17.1  | 140  | 165    |       | HP1053/JHP0372 |                                                                   | 17.1  | 217  | 194                                                        | -25 different start codon assignment and insertion                                                                                       |
| HP1053/JHP0372 |                                                                   | 17.1  | 217  | 194    |       | HP1054/JHP0371 | <i>minC</i>                                                       | 17.2  | 422  | 440                                                        | 23 different start codon assignment (HP1053 codon was corrected by SWISSProt; O25693) and deletion                                       |
| HP1054/JHP0371 | <i>minC</i>                                                       | 17.2  | 422  | 440    |       | HP1055/JHP0370 |                                                                   | 17.2  | 314  | 313                                                        | -18 different start codon assignment                                                                                                     |
| HP1055/JHP0370 |                                                                   | 17.2  | 314  | 313    |       | HP1056/JHP0369 |                                                                   | 17.2  | 284  | 289                                                        | 1 different start due to natural polymorphism of the 5' end                                                                              |
| HP1056/JHP0369 |                                                                   | 17.2  | 284  | 289    |       |                |                                                                   |       |      |                                                            | -5 insertion (natural polymorphism)                                                                                                      |



Table 3 - List of CDS pairs that differ in length

|               |                                                  |      |     |     |     |     |                                                                                                                                                                                                                     |    |
|---------------|--------------------------------------------------|------|-----|-----|-----|-----|---------------------------------------------------------------------------------------------------------------------------------------------------------------------------------------------------------------------|----|
| HP1262/HP1183 | <i>mucC</i>                                      | 6.1  | 266 | 265 | 1   | 1   | 1                                                                                                                                                                                                                   | 2a |
| HP1266/HP1187 | <i>mucG</i>                                      | 6.1  | 844 | 843 | 5   | 5   | -5 insertion (natural polymorphism)                                                                                                                                                                                 | 1  |
| HP1274/HP1195 | <i>pflA</i>                                      | 14.2 | 801 | 803 | 2   | 2   | -2 insertion (natural polymorphism)                                                                                                                                                                                 | 1  |
| HP1276/HP1197 |                                                  | 17.2 | 94  | 123 | 29  | 29  | -29 same chromosomal location but no homology at all                                                                                                                                                                | 6  |
| HP1284/HP1204 |                                                  | 17.1 | 346 | 352 | 6   | 6   | -6 different stop codon due to C-ter natural polymorphism                                                                                                                                                           | 3b |
| HP1285/HP1205 |                                                  | 5.4  | 230 | 245 | 15  | 15  | -15 different start codon assignment                                                                                                                                                                                | 2a |
| HP1288/HP1208 | <i>qplA</i>                                      | 17.2 | 132 | 117 | 15  | 15  | 15 different start codon assignment and insertion                                                                                                                                                                   | 1  |
| HP1301/HP1221 | <i>rpl15</i>                                     | 10.3 | 135 | 133 | 2   | 2   | 2 insertion (natural polymorphism)                                                                                                                                                                                  | 1  |
| HP1303/HP1223 | <i>rpl18</i>                                     | 10.3 | 119 | 118 | 1   | 1   | 1 difference due to two consecutive start codons for HP0515                                                                                                                                                         | 2a |
| HP1321/HP1241 |                                                  | 17.1 | 377 | 376 | 1   | 1   | 1 deletion (natural polymorphism)                                                                                                                                                                                   | 1  |
| HP1322/HP1242 |                                                  | 17.2 | 201 | 192 | 9   | 9   | 9 different start codon assignment. HP1322 codon is not conserved in JHP1242                                                                                                                                        | 2a |
| HP1324/HP1244 |                                                  | 17.2 | 83  | 64  | 19  | 19  | 19 different start codon due to a nucleotide insertion generating a premature stop codon in JHP1244                                                                                                                 | 2b |
| HP1328/HP1248 |                                                  | 7.4  | 338 | 341 | 3   | 3   | -3 insertion (natural polymorphism)                                                                                                                                                                                 | 1  |
| HP1330/HP1250 | <i>ccsB2</i>                                     | 7.1  | 115 | 118 | 3   | 3   | -3 insertion (natural polymorphism)                                                                                                                                                                                 | 3b |
| HP1333/HP1253 | <i>acfD</i>                                      | 17.2 | 382 | 376 | 6   | 6   | -6 insertion (natural polymorphism)                                                                                                                                                                                 | 1  |
| HP1339/HP1258 | <i>expB2</i>                                     | 7.6  | 166 | 145 | 21  | 21  | 21 different start codon assignment corrected for HP1339 by SWISSProt                                                                                                                                               | 2a |
| HP1341/HP1260 | <i>tonB2</i>                                     | 7.4  | 285 | 280 | 5   | 5   | 5 deletion (natural polymorphism)                                                                                                                                                                                   | 1  |
| HP1342/HP1261 | <i>hopN</i>                                      | 13.5 | 691 | 696 | 5   | 5   | -5 insertions and deletions (natural polymorphism)                                                                                                                                                                  | 1  |
| HP1348/HP1267 | <i>hopV</i>                                      | 3.1  | 240 | 237 | 3   | 3   | 3 difference due to 4 codons replacement by one codon just before the stop codon                                                                                                                                    | 3b |
| HP1353/HP1272 | <i>placC</i>                                     | 8.2  | 315 | 304 | 11  | 11  | 11 regulated by slipped-strand mispairing mechanism (two poly C track). JHP1272 was artificially adjusted by Astra as a 1164 aa protein                                                                             | 5  |
| HP1354/HP1272 | Predicted adenine specific DNA methyltransferase | 8.2  | 835 | 304 | 531 | 531 | 531 regulated by slipped-strand mispairing mechanism (two poly C track). JHP1272 was artificially adjusted by Astra as a 1164 aa protein                                                                            | 5  |
| HP1361/HP1279 | <i>comEC</i>                                     | 14.4 | 417 | 409 | 8   | 8   | 8 different start codon due to a nucleotide deletion in JHP1279                                                                                                                                                     | 2b |
| HP1362/HP1280 | <i>dhcB</i>                                      | 8.1  | 488 | 486 | 2   | 2   | 2 C-ter natural polymorphism due to codon deletions                                                                                                                                                                 | 3b |
| HP1363/HP1281 |                                                  | 17.1 | 466 | 464 | 2   | 2   | 2 deletion (natural polymorphism)                                                                                                                                                                                   | 1  |
| HP1364/HP1282 | histidine kinase sensor                          | 12.1 | 397 | 344 | 53  | 53  | 53 different start codon (natural polymorphism)                                                                                                                                                                     | 2c |
| HP1366/HP1442 | <i>hpyA/IR</i>                                   | 8.2  | 423 | 326 | 97  | 97  | 97 different start codon due to slipped-strand mispairing mechanism (poly A track- typeIIS restriction enzyme JHP1442 inactive)                                                                                     | 5  |
| HP1369/HP1284 | Predicted type III restriction enzyme M protein  | 8.2  | 474 | 649 | 175 | 175 | -175 HP369/HP1370 and JHP1284 have decayed from an ancestral type III R-M system                                                                                                                                    | 6  |
| HP1370/HP1284 | Predicted type III restriction enzyme M protein  | 8.2  | 288 | 649 | 361 | 361 | -361 HP369/HP1370 and JHP1284 have decayed from an ancestral type III R-M system                                                                                                                                    | 6  |
| HP1371/HP1285 |                                                  | 17.1 | 968 | 972 | 4   | 4   | -4 insertions (natural polymorphism)                                                                                                                                                                                | 1  |
| HP1374/HP1328 | <i>clpX</i>                                      | 11.4 | 446 | 452 | 6   | 6   | -6 insertion (natural polymorphism)                                                                                                                                                                                 | 1  |
| HP1377/HP1291 |                                                  | 17.1 | 146 | 129 | 17  | 17  | 17 different start codon due to a nucleotide deletion in JHP1291                                                                                                                                                    | 2b |
| HP1379/HP1293 | <i>lon</i>                                       | 11.4 | 835 | 831 | 4   | 4   | 4 deletion (natural polymorphism)                                                                                                                                                                                   | 1  |
| HP1380/HP1294 | <i>lyrA</i>                                      | 1.1  | 265 | 275 | 10  | 10  | -10 different start codon assignment (the 199 start codon appears to be the correct one)                                                                                                                            | 2a |
| HP1382/HP1295 | <i>mucG</i>                                      | 8.1  | 130 | 287 | 157 | 157 | -157 different start codon due to extensive polymorphism of the N-ter                                                                                                                                               | 2c |
| HP1384/HP1441 |                                                  | 17.1 | 68  | 67  | 1   | 1   | 1 difference due to two consecutive start codon for HP1384                                                                                                                                                          | 2a |
| HP1387/HP1438 | <i>dhcQ</i>                                      | 8.1  | 350 | 323 | 27  | 27  | 27 different stop codons with change in the reading frame                                                                                                                                                           | 3a |
| HP1393/HP1434 | <i>recN</i>                                      | 8.1  | 524 | 522 | 2   | 2   | 2 different stop codon due to point mutations (JHP1434 has 3 consecutive stops against one for HP1393)                                                                                                              | 3a |
| HP1394/HP1433 | <i>ppnK</i>                                      | 4.11 | 284 | 307 | 23  | 23  | -23 different start codon assignment (corrected for JHP1433 by SWISSProt)                                                                                                                                           | 2a |
| HP1396/HP1431 |                                                  | 17.1 | 288 | 293 | 5   | 5   | -5 1 and 5 a.a. deletion followed by a 11 a.a. C-terminal extension in 199 due to a nucleotide insertion                                                                                                            | 3a |
| HP1400/HP1426 |                                                  | 17.1 | 271 | 282 | 11  | 11  | -11 natural polymorphism along the entire polypeptide                                                                                                                                                               | 1  |
| HP1402/HP1424 | <i>fccA3</i>                                     | 7.4  | 842 | 841 | 1   | 1   | 1 difference due to two consecutive start codons for HP1400 corrected by Astra                                                                                                                                      | 2a |
| HP1403/HP1425 | <i>hscRB3</i>                                    | 8.2  | 993 | 991 | 2   | 2   | 2 deletion (natural polymorphism)                                                                                                                                                                                   | 1  |
| HP1408/HP1301 |                                                  | 17.2 | 817 | 815 | 2   | 2   | 2 deletion (natural polymorphism)                                                                                                                                                                                   | 2a |
| HP1409/HP1301 |                                                  | 17.2 | 111 | 178 | 67  | 67  | -67 different start and stop codons due to natural polymorphism                                                                                                                                                     | 2c |
| HP1409/HP1302 |                                                  | 17.2 | 578 | 578 | 310 | 310 | 310 frame-shift or sequencing error                                                                                                                                                                                 | 4  |
| HP1410/HP1303 |                                                  | 17.2 | 394 | 410 | 16  | 16  | -16 different stop codon due to a nucleotide deletion                                                                                                                                                               | 4  |
| HP1411/HP1304 |                                                  | 17.2 | 619 | 309 | 310 | 310 | 310 frame-shift or sequencing error                                                                                                                                                                                 | 3a |
| HP1411/HP1305 |                                                  | 17.2 | 619 | 243 | 376 | 376 | 376 frame-shift or sequencing error                                                                                                                                                                                 | 4  |
| HP1412/HP1306 |                                                  | 17.2 | 308 | 51  | 257 | 257 | 257 different start and stop codons due to natural polymorphism                                                                                                                                                     | 2c |
| HP1412/HP1307 |                                                  | 17.2 | 308 | 240 | 68  | 68  | 68 different start and stop codons due to natural polymorphism                                                                                                                                                      | 3b |
| HP1415/HP1310 | <i>micA</i>                                      | 10.4 | 266 | 277 | 11  | 11  | -11 different stop codon (natural polymorphism of the last 5 aa); both start codons incorrect and refined by SWISSPROT to 311 and 312 aa, respectively, due to missing active site with the original CDS prediction | 2a |
| HP1417/HP1312 | Predicted ATP/GTP-binding protein                | 17.1 | 0   | 265 | 265 | 265 | -265 regulated by slipped-strand mispairing mechanism (poly G track)                                                                                                                                                | 5  |
| HP1430/HP1323 | Histidine & glutamine-rich metal-binding protein | 17.1 | 689 | 692 | 3   | 3   | -3 insertions (natural polymorphism)                                                                                                                                                                                | 1  |
| HP1432/HP1321 |                                                  | 7.4  | 72  | 77  | 5   | 5   | -5 insertion (natural polymorphism)                                                                                                                                                                                 | 1  |
| HP1433/HP1326 |                                                  | 17.2 | 856 | 792 | 64  | 64  | 64 deletion (natural polymorphism) - regulated by slipped-strand mispairing mechanism. Both genes are on)                                                                                                           | 1  |

Table 3 - List of CDS pairs that differ in length

|                  |      |     |      |     |                                                                                                                                                                                        |         |
|------------------|------|-----|------|-----|----------------------------------------------------------------------------------------------------------------------------------------------------------------------------------------|---------|
| HP1436/JHP1329   | 17.2 | 82  | 86   | 4   | -4 insertion (natural polymorphism)                                                                                                                                                    | 1       |
| HP1437/JHP1330   | 17.2 | 239 | 187  | 52  | 52 insertion, deletion, different start codon (natural polymorphism) and stop codon due to a nucleotide insertion                                                                      | 1 2c 3a |
| HP1438/JHP1331   | 17.1 | 338 | 161  | 177 | 177 different stop codon with C-ter 100 aa without homology                                                                                                                            | 3b      |
| HP1439/JHP1332   | 17.2 | 81  | 141  | 60  | -60 different stop codon due to the insertion of two distinct nucleotides                                                                                                              | 3a      |
| HP1439.1/JHP1332 | 17.2 | 74  | 141  | 67  | -67 different stop codon due to the insertion of two distinct nucleotides                                                                                                              | 3a      |
| HP1443/JHP1336   | 4.12 | 268 | 274  | 6   | -6 different stop codon due to a nucleotide deletion in JHP1336                                                                                                                        | 3a      |
| HP1449/JHP1342   | 17.1 | 117 | 118  | 1   | -1 insertion (natural polymorphism)                                                                                                                                                    | 1       |
| HP1450/JHP1343   | 17.1 | 547 | 549  | 2   | -2 insertion (natural polymorphism)                                                                                                                                                    | 1       |
| HP1451/JHP1344   | 17.1 | 264 | 258  | 6   | 6 insertion (natural polymorphism)                                                                                                                                                     | 1       |
| HP1453/JHP1346   | 13.5 | 746 | 744  | 2   | 2 deletion (natural polymorphism)                                                                                                                                                      | 1       |
| HP1455/JHP1348   | 17.2 | 130 | 113  | 17  | 17 different start codon due to a nucleotide substitution generating a premature stop codon in JHP1348                                                                                 | 2b      |
| HP1462/JHP1355   | 17.1 | 172 | 195  | 23  | -23 different start codon assignment                                                                                                                                                   | 2a      |
| HP1470/JHP1363   | 8.1  | 892 | 897  | 5   | -5 difference due to two consecutive start codon corrected for HP1470 by SWISSProt and insertion (natural polymorphism)                                                                | 1 2a    |
| HP1471/JHP1364   | 8.2  | 397 | 406  | 9   | -9 different first 70 aa of N-ter (regulated by slipped-strand mispairing mechanism poly G track)                                                                                      | 5       |
| HP1472/JHP1365   | 8.2  | 679 | 678  | 1   | 1 different stop codon due to a nucleotide substitution in JHP1365 (both are inactive forms of a type II R-M system)                                                                   | 3a      |
| HP1478/JHP1371   | 8.1  | 682 | 681  | 1   | 1 difference due to two consecutive start codons for HP1478                                                                                                                            | 2a      |
| HP1479/JHP1372   | 17.1 | 844 | 841  | 3   | 3 deletion (natural polymorphism)                                                                                                                                                      | 1       |
| HP1490/JHP1383   | 14.5 | 449 | 441  | 8   | 8 different start codon assignment and deletion                                                                                                                                        | 1 2a    |
| HP1499/JHP1392   | 17.2 | 272 | 306  | 34  | -34 regulated slipped-strand mispairing mechanism (poly A track)                                                                                                                       | 5       |
| HP1500/JHP1393   | 17.2 | 23  | 26   | 3   | -3 the two predicted proteins do not share any significant homology and are considered orthologues based on the genetic location raising the possibility that they are artifactual CDS | 6       |
| HP1507/JHP1400   | 17.1 | 385 | 399  | 14  | -14 different start codon assignment                                                                                                                                                   | 2a      |
| HP1509/JHP1402   | 17.1 | 262 | 220  | 42  | 42 different start codon assignment (corrected for HP1509 by SWISSProt)                                                                                                                | 2a      |
| HP1512/JHP1405   | 7.4  | 877 | 879  | 2   | -2 insertion (natural polymorphism)                                                                                                                                                    | 1       |
| HP1513/JHP1406   | 10.6 | 386 | 390  | 4   | 4 insertion (natural polymorphism) of 4 codons at the N-ter                                                                                                                            | 2c      |
| HP1521/JHP1410   | 8.2  | 967 | 969  | 2   | -2 insertion (natural polymorphism)                                                                                                                                                    | 1       |
| HP1522/JHP1411   | 8.2  | 0   | 202  | 202 | -202 regulated by slipped-strand mispairing mechanism (poly G track)                                                                                                                   | 5       |
| HP1533/JHP1421   | 17.1 | 231 | 208  | 23  | 23 different start codon assignment (corrected for HP1533 by SWISSProt)                                                                                                                | 2a      |
| HP1541/JHP1438   | 9.3  | 999 | 1001 | 2   | -2 insertion (natural polymorphism)                                                                                                                                                    | 1       |
| HP1545/JHP1454   | 4.2  | 394 | 389  | 5   | 5 deletion (natural polymorphism)                                                                                                                                                      | 1       |
| HP1550/JHP1449   | 11.1 | 503 | 526  | 23  | -23 different start codon assignment                                                                                                                                                   | 2a      |
| HP1551/JHP1448   | 17.1 | 127 | 97   | 30  | 30 different stop codon due to major deletion at 3'end                                                                                                                                 | 3b      |
| HP1553/JHP1446   | 8.1  | 945 | 946  | 1   | -1 insertion (natural polymorphism)                                                                                                                                                    | 1       |
| HP1568/JHP1476   | 17.1 | 183 | 185  | 2   | -2 insertion (natural polymorphism)                                                                                                                                                    | 1       |
| HP1571/JHP1479   | 13.1 | 315 | 314  | 1   | 1 deletion (natural polymorphism)                                                                                                                                                      | 1       |
| HP1572/JHP1480   | 12.1 | 372 | 374  | 2   | -2 insertion (natural polymorphism)                                                                                                                                                    | 1       |
| HP1579/JHP1486   | 17.2 | 142 | 140  | 2   | 2 deletion (natural polymorphism) and different stop codon (1 aa C-ter extension)                                                                                                      | 1 3b    |
| HP1580/JHP1487   | 17.2 | 220 | 198  | 22  | 22 different start codon resulting in the first N-ter 14 aa without any homology                                                                                                       | 2c      |
| HP1581/JHP1488   | 13.4 | 336 | 335  | 1   | 1 different stop codon due to one nucleotide substitution in JHP1488                                                                                                                   | 3a      |
| HP1587/JHP1493   | 17.1 | 155 | 209  | 54  | -54 different stop codon with C-ter extension due to a nucleotide deletion in JHP1493                                                                                                  | 3a      |

\* the code numbers correspond to the different sources of variation as classified in Table 4
